# Supplementary material for: Self-assembly of rigid amphiphilic graft cyclic-brush copolymers to nanochannels using dissipative particle dynamics simulation
Source: Royal Society of Chemistry journal article supplement (doi:10.1039/d3sm01674a), 2024-01-01
Supplement: d3sm01674a1.pdf [file d3sm01674a1.pdf]

## Supporting Information

for

### **Self-Assembly of Rigid Amphiphilic Graft Cyclic-brush Copolymers to Nanochannels Using Dissipative Particle Dynamics Simulation**

Meng Du<sup>a#</sup> Xinrong Yan<sup>a#</sup>, Nanrong Zhao<sup>a</sup> Xin Wang<sup>a</sup> and Dingguo Xu<sup>a,b,\*</sup>

<sup>a</sup> *MOE Key Laboratory of Green Chemistry and Technology, College of Chemistry,  
Sichuan University, Chengdu, Sichuan 610064, PR China*

<sup>b</sup> *Research Center for Materials Genome Engineering, Sichuan University, Chengdu,  
Sichuan 610065, PR China*

# Both authors contributed equally.

\* To whom correspondence should be addressed: E-mail: [dgxu@scu.edu.cn](mailto:dgxu@scu.edu.cn) (D.X.) Tel:

86-28-85406156

## Contents

**Figure S1:** Snapshots of the last frame with the parameters set to  $a_{AS}=25$ ,  $a_{BS}=65$  and  $a_{AB}=45$ , which indicates hydrophilic beads are inside and hydrophobic beads are outside.

**Figure S2-S36:** Snapshots of the last frames for all 605 models with different interaction parameters and settings of copolymer sizes and concentrations.

**Figure S37.** Summary of the phase transformation along the changes of simulation parameters, in which the interaction affinity of A and S decreases and the interaction between A and B increases. Herein, the parameters of  $\varphi=40$  and  $N=20$ .

**Figure S38.** Summary of the phase transformation along the changes of simulation parameters, in which the repulsion of B and S beads increases. Herein, the parameters of  $\varphi=40$  and  $N=20$ . Meanwhile, there is a big interaction parameter for A and B beads.

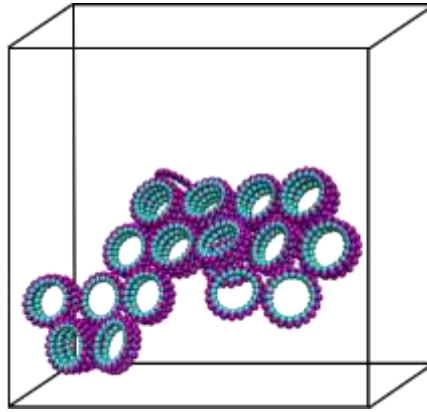

**Figure S1.** The snapshot of last frame extracted from MD trajectory in  $\varphi=40$ ,  $N=20$ ,  $a_{AS}=25$ ,  $a_{BS}=65$  and  $a_{AB}=45$ , which indicates hydrophilic beads are inside and hydrophobic beads are outside.

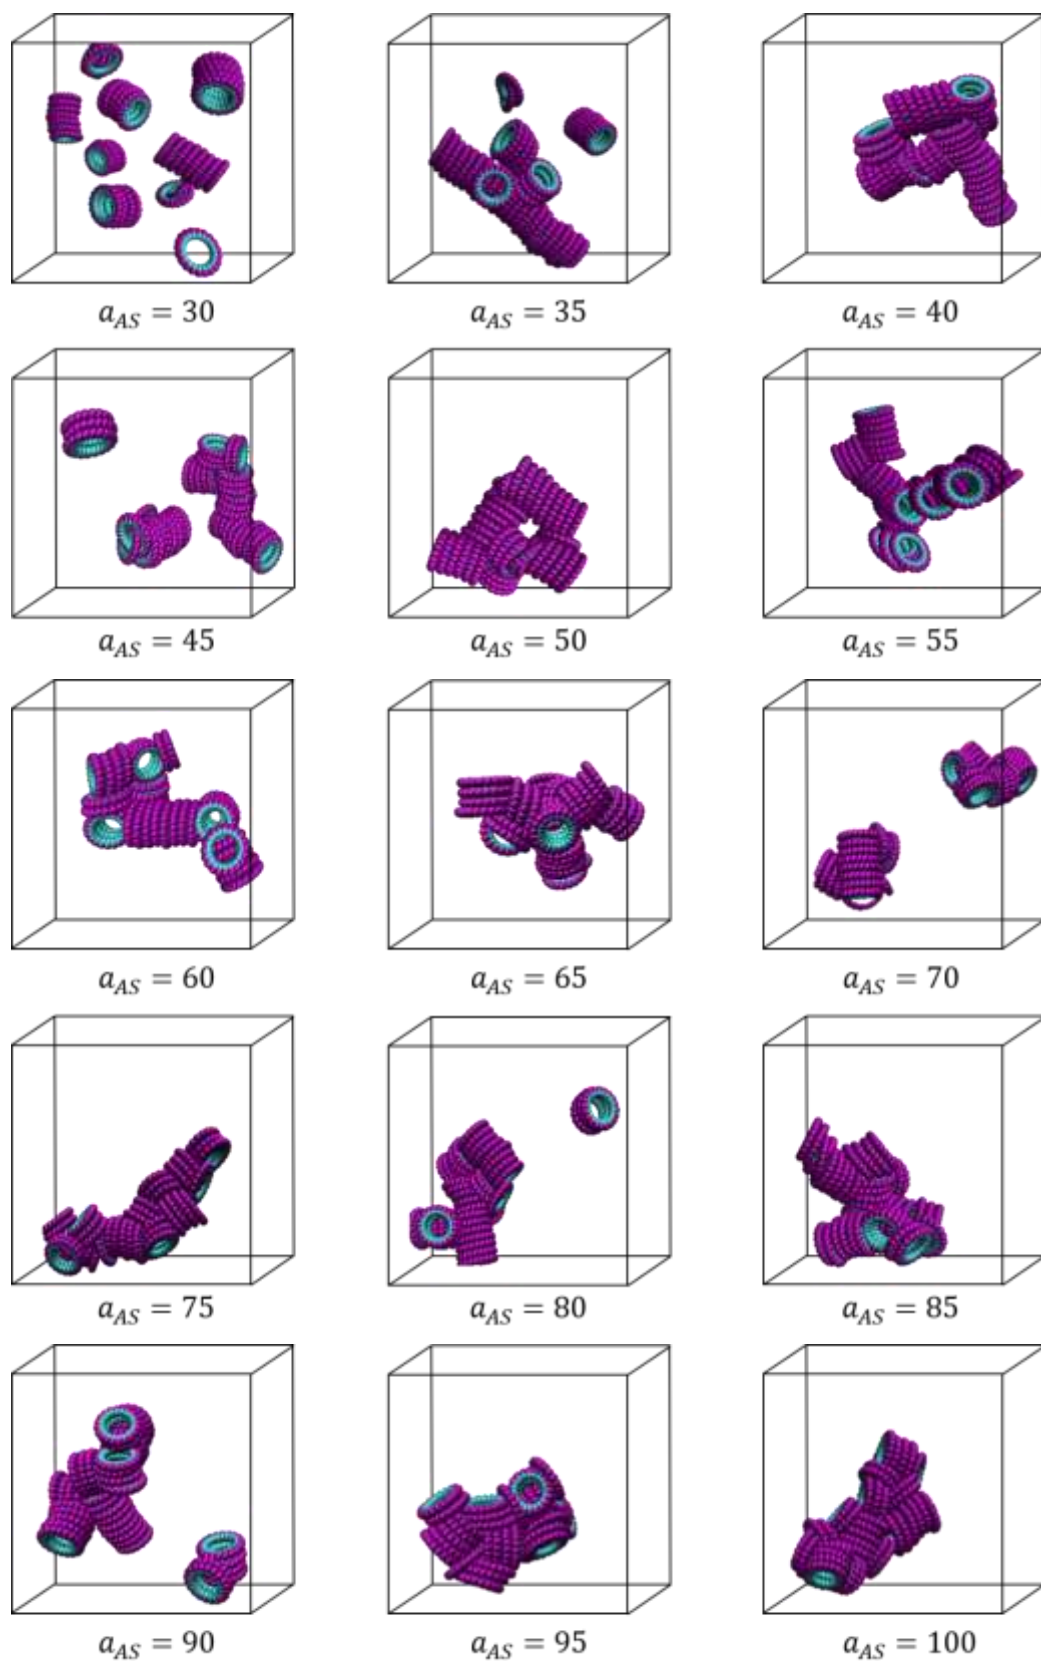

**Figure S2.** The snapshots of last frames extracted from MD trajectories in different values of  $a_{AS}$ , in which  $\varphi=40$ ,  $N=20$ ,  $a_{BS}=25$  and  $a_{AB}=25$ .

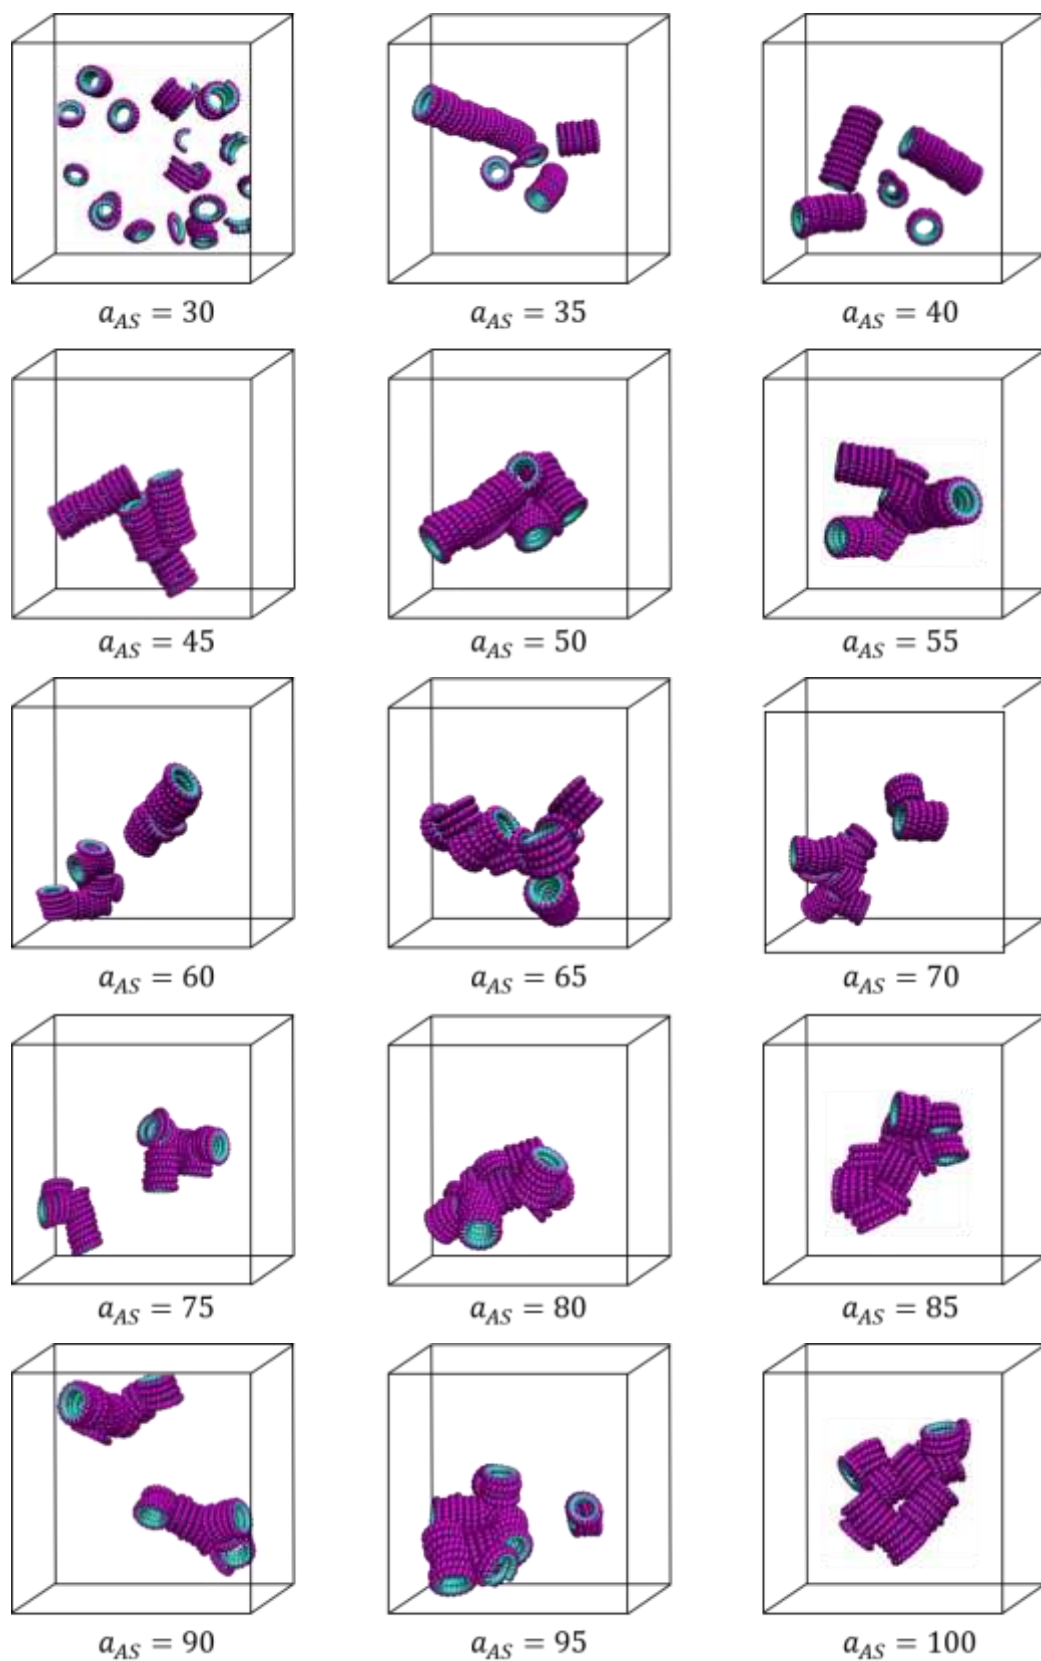

**Figure S3.** The snapshots of last frames extracted from MD trajectories in different values of  $a_{AS}$ , in which  $\varphi=40$ ,  $N=20$ ,  $a_{BS}=25$  and  $a_{AB}=30$ .

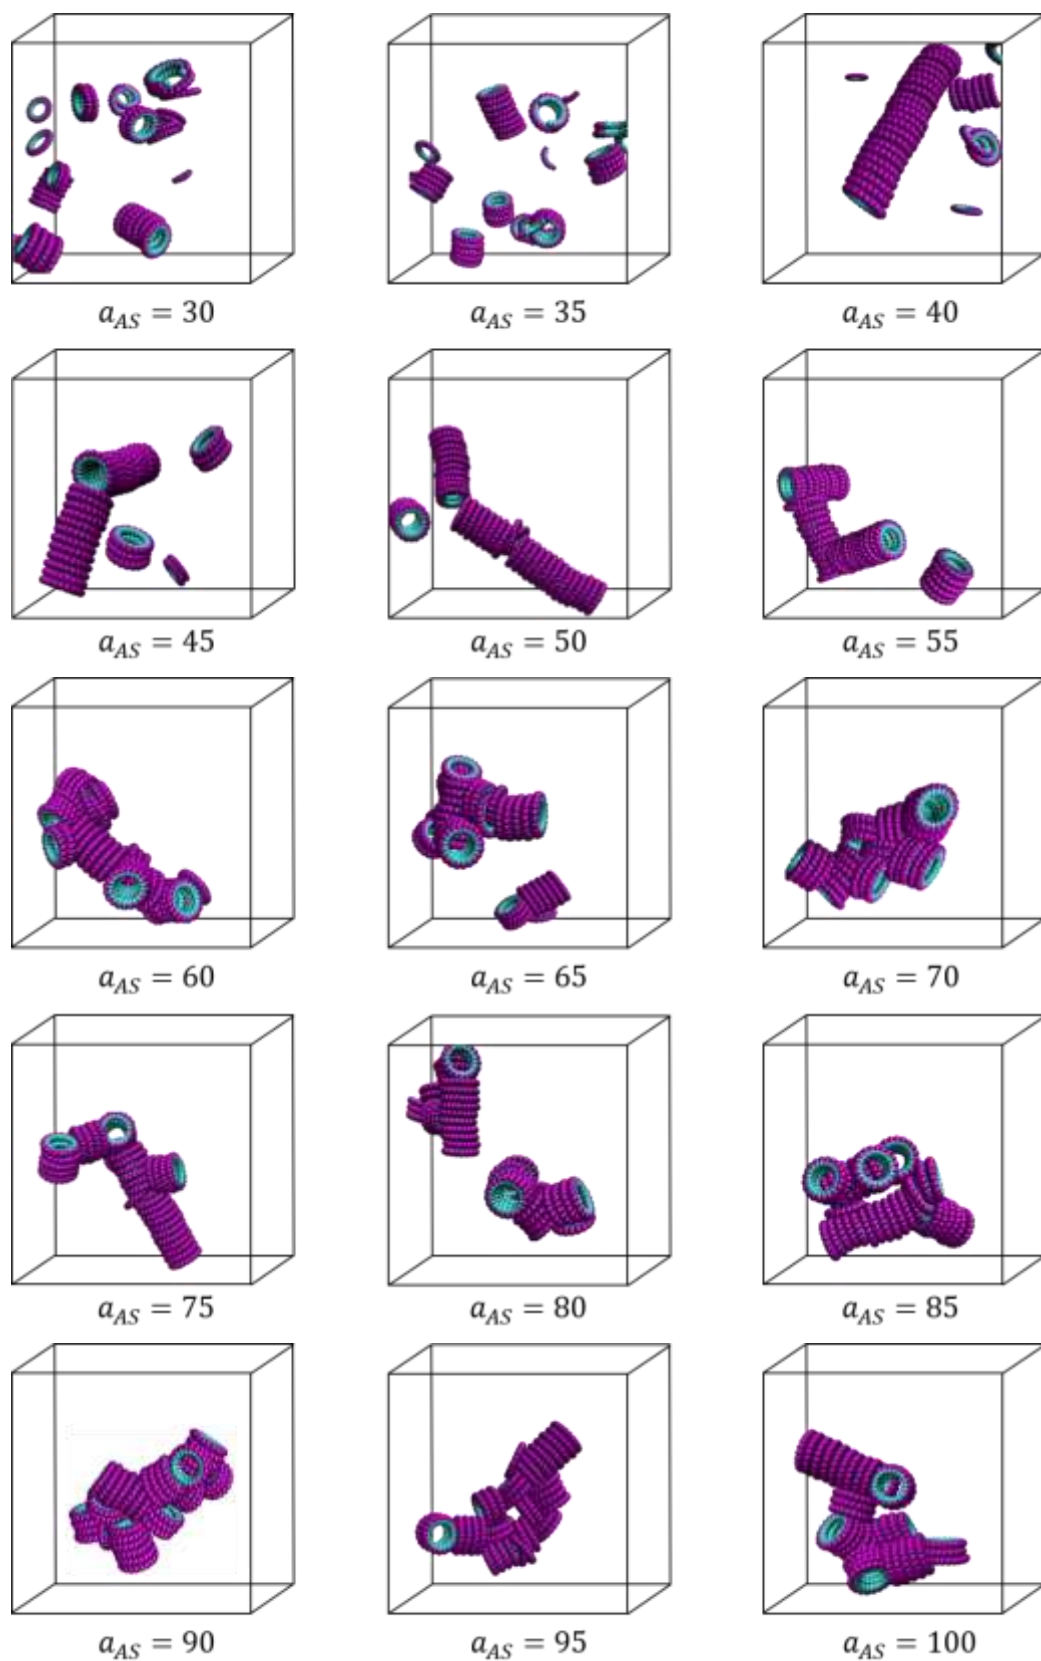

**Figure S4.** The snapshots of last frames extracted from MD trajectories in different values of  $a_{AS}$ , in which  $\varphi=40$ ,  $N=20$ ,  $a_{BS}=25$  and  $a_{AB}=35$ .

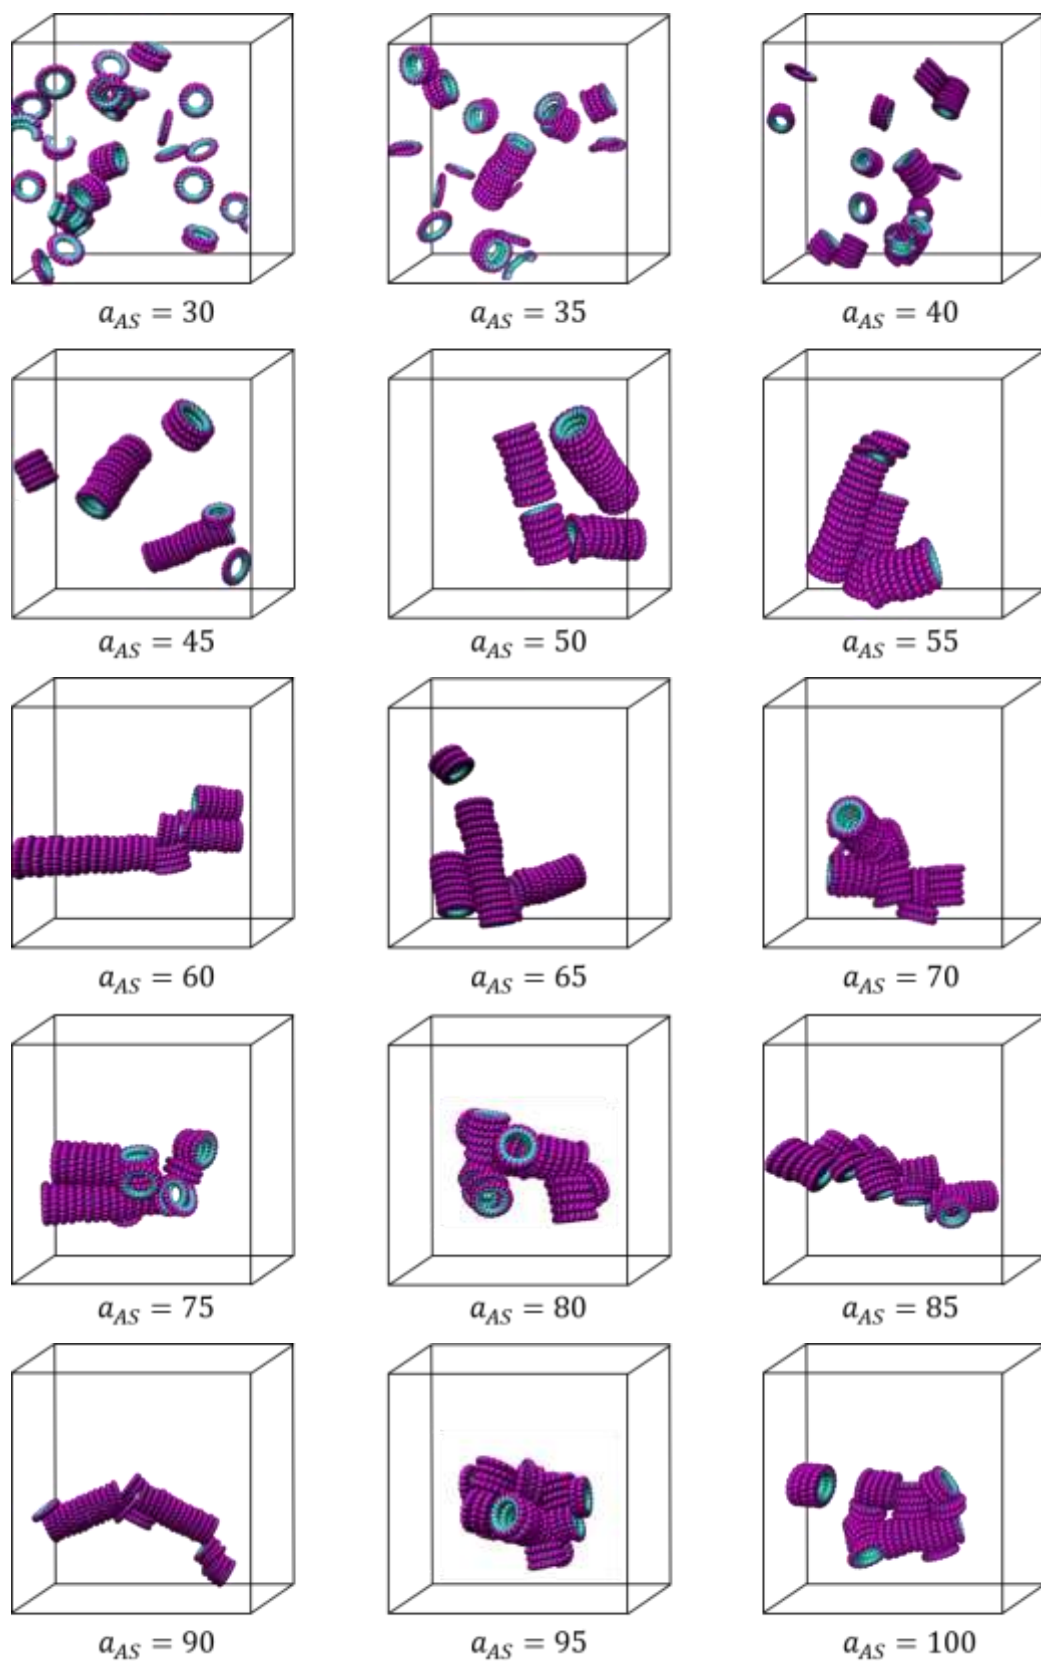

**Figure S5.** The snapshots of last frames extracted from MD trajectories in different values of  $a_{AS}$ , in which  $\varphi=40$ ,  $N=20$ ,  $a_{BS}=25$  and  $a_{AB}=40$ .

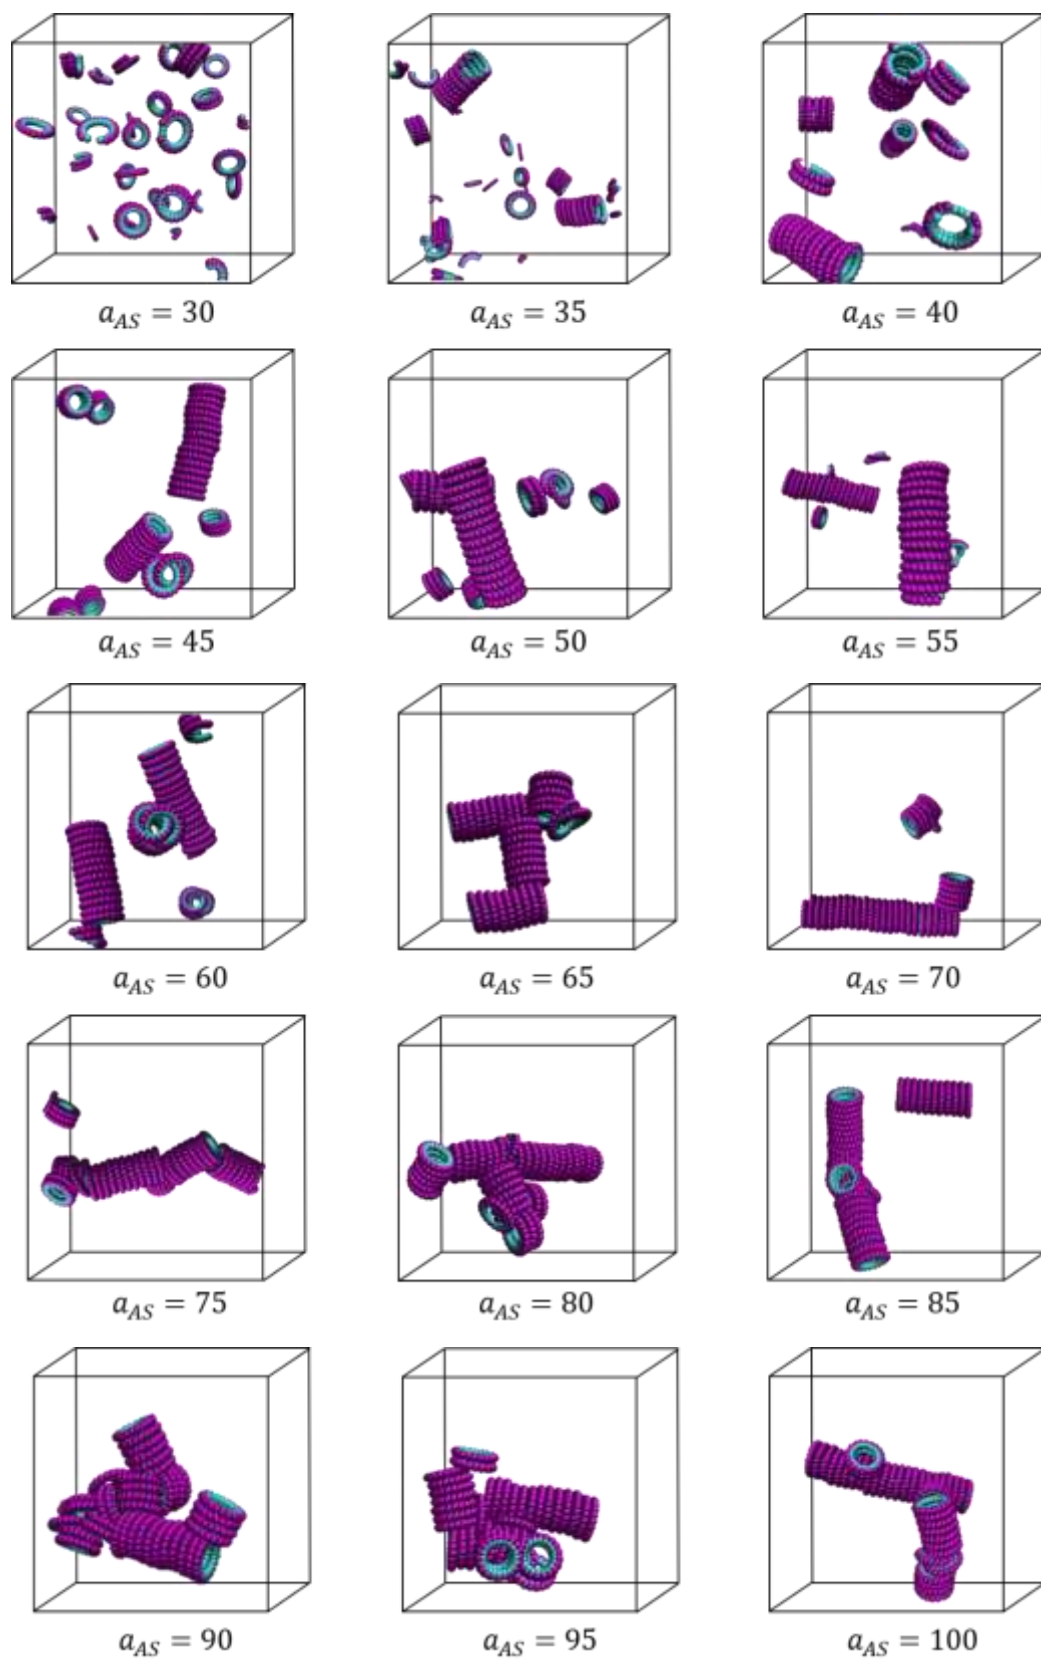

**Figure S6.** The snapshots of last frames extracted from MD trajectories in different values of  $a_{AS}$ , in which  $\varphi=40$ ,  $N=20$ ,  $a_{BS}=25$  and  $a_{AB}=45$ .



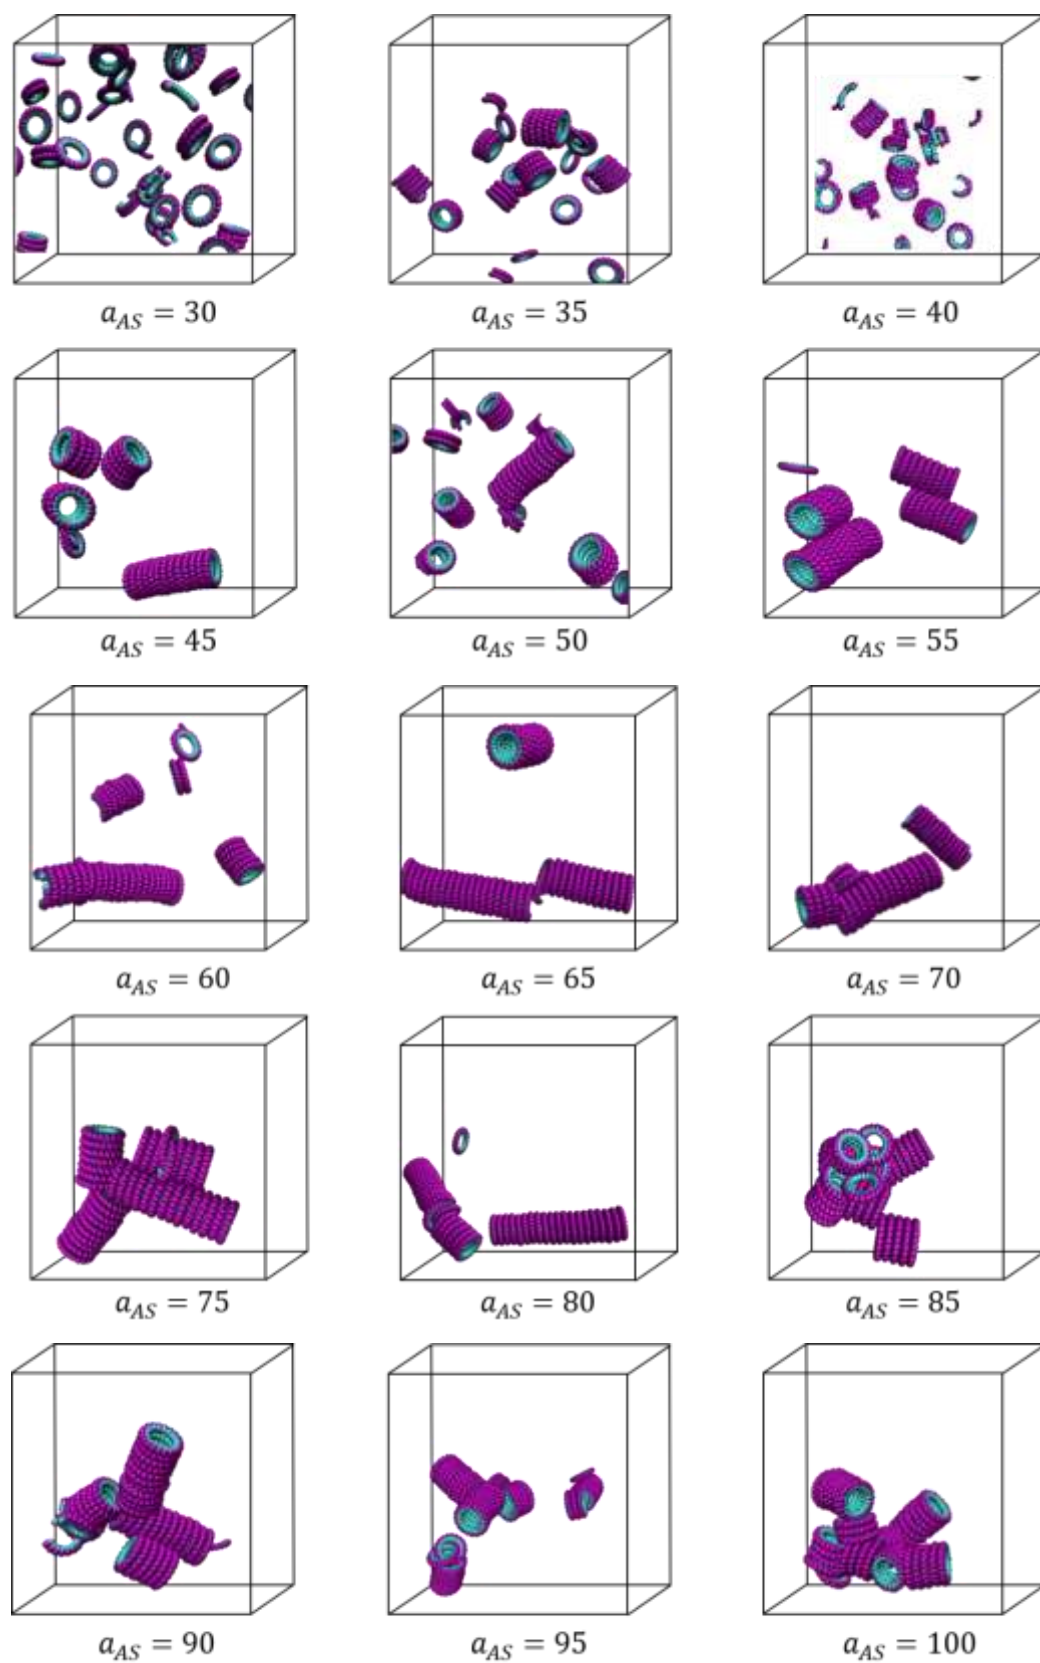

**Figure S7.** The snapshots of last frames extracted from MD trajectories in different values of  $a_{AS}$ , in which  $\varphi=40$ ,  $N=20$ ,  $a_{BS}=25$  and  $a_{AB}=50$ .

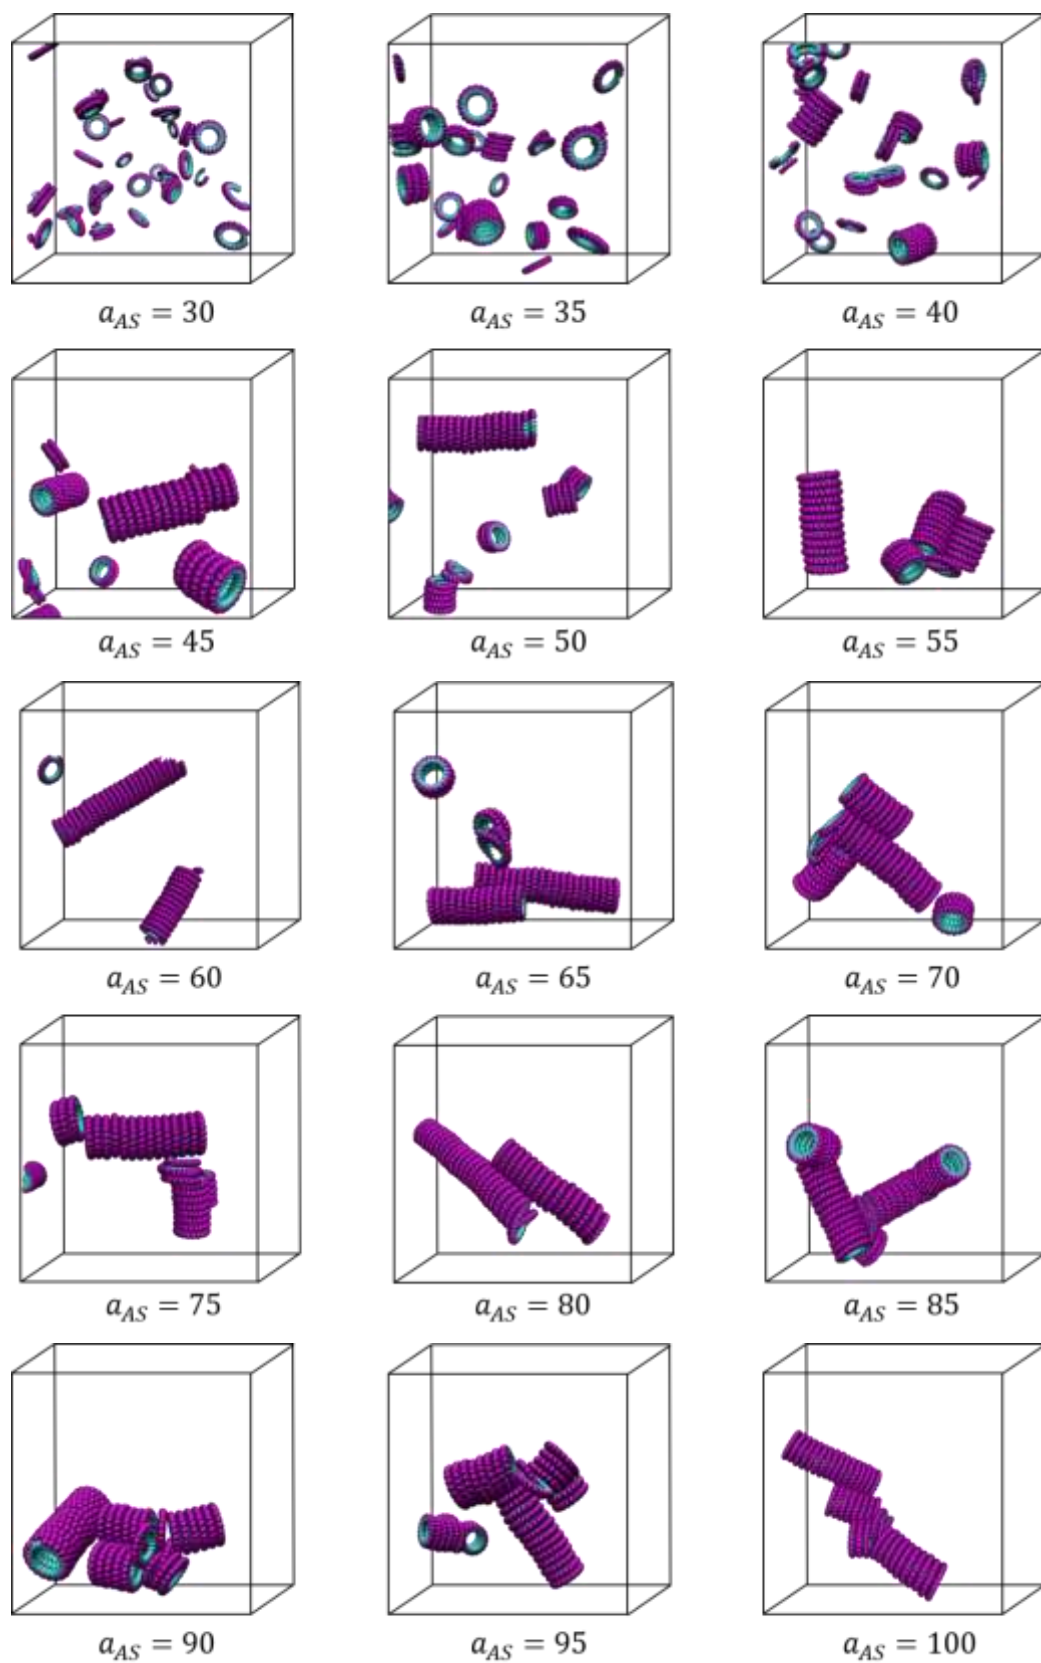

**Figure S8.** The snapshots of last frames extracted from MD trajectories in different values of  $a_{AS}$ , in which  $\varphi=40$ ,  $N=20$ ,  $a_{BS}=25$  and  $a_{AB}=55$ .

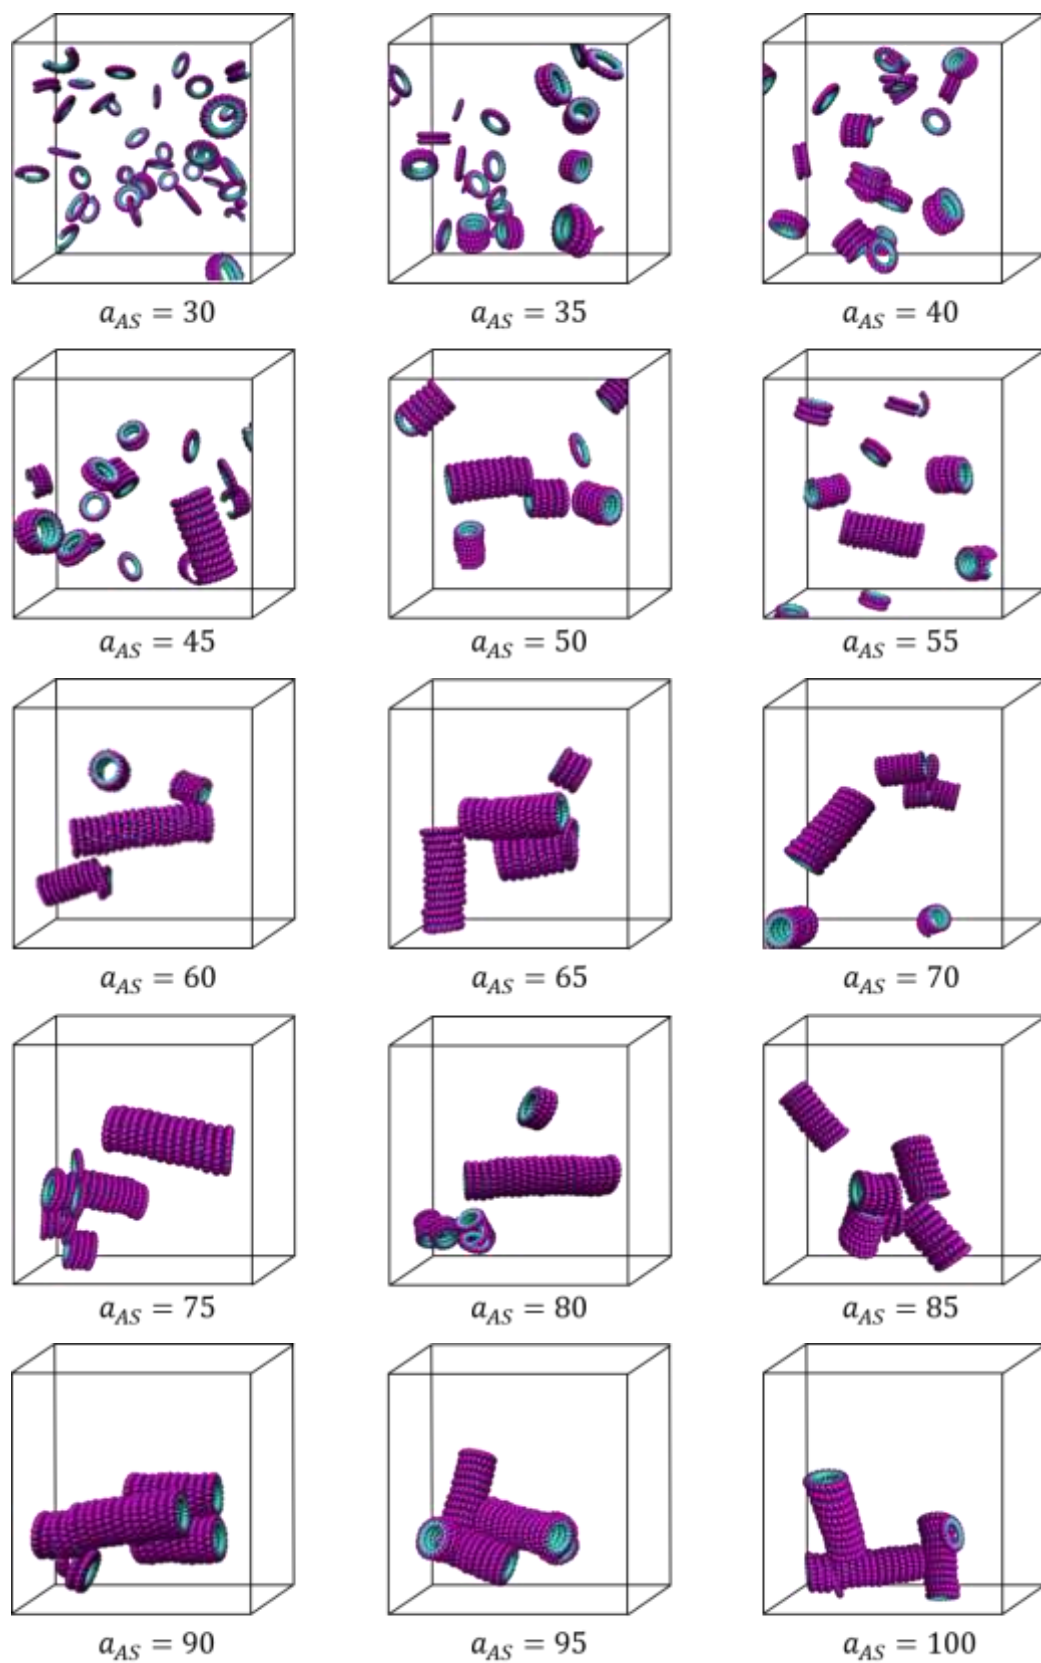

**Figure S9.** The snapshots of last frames extracted from MD trajectories in different values of  $a_{AS}$ , in which  $\varphi=40$ ,  $N=20$ ,  $a_{BS}=25$  and  $a_{AB}=60$ .

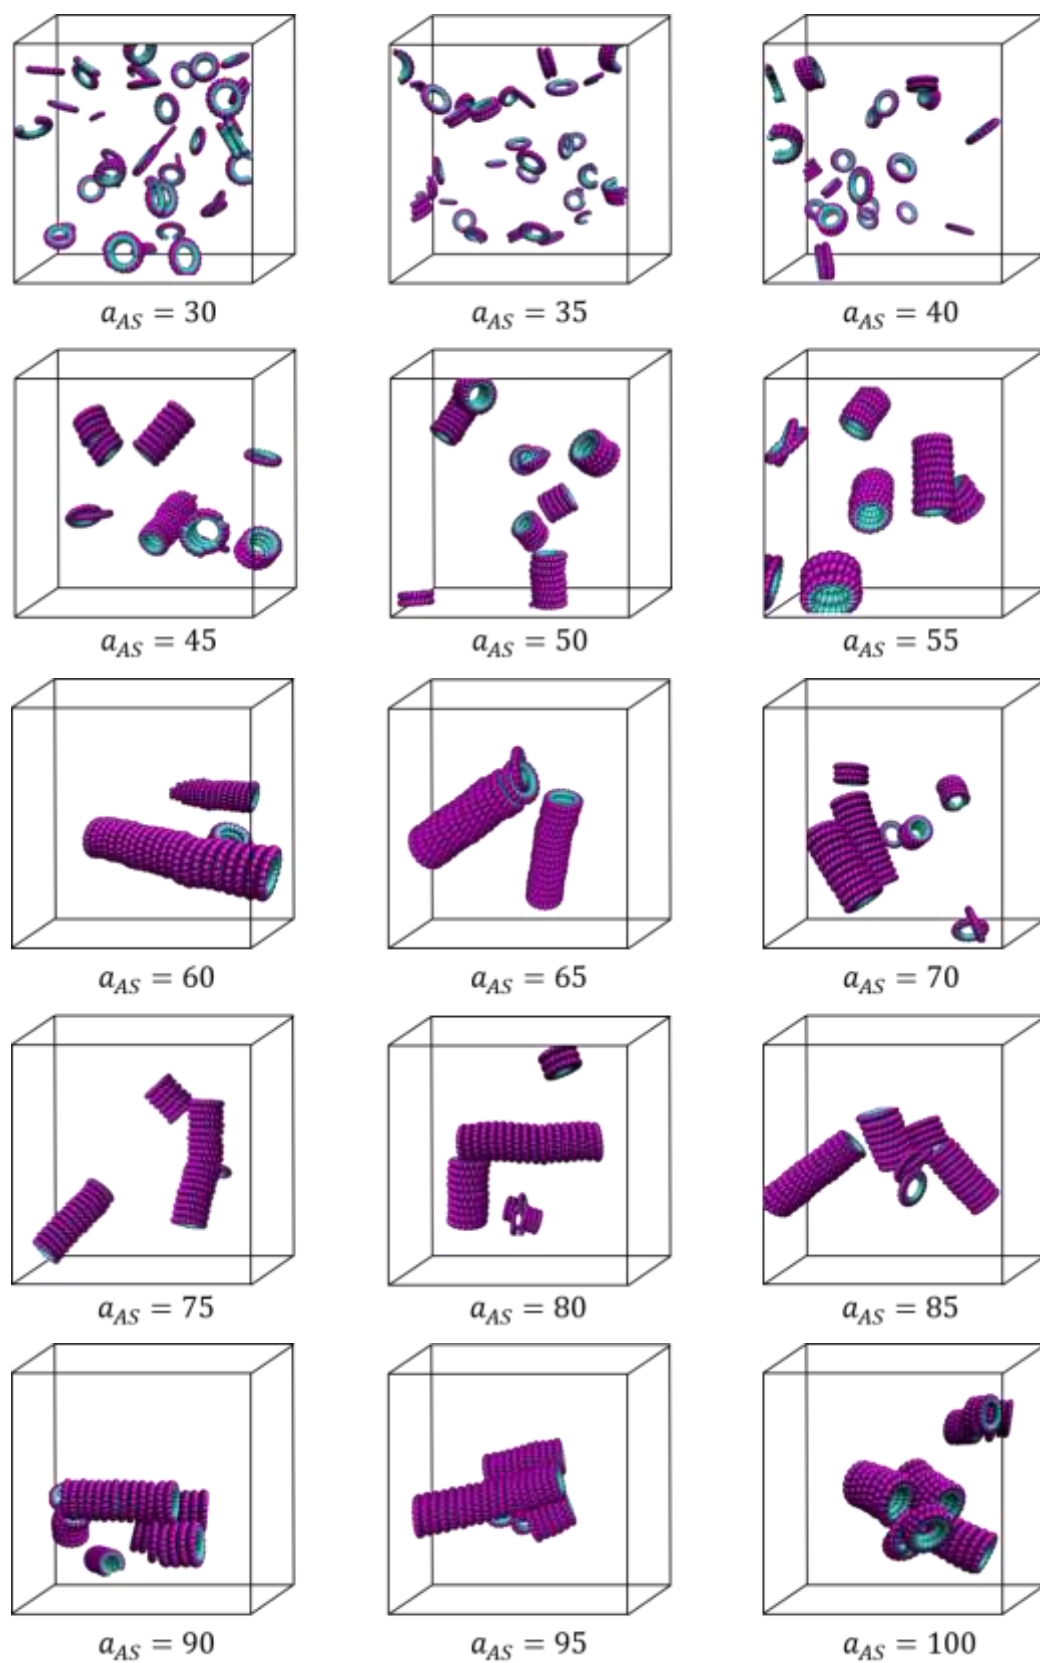

**Figure S10.** The snapshots of last frames extracted from MD trajectories in different values of  $a_{AS}$ , in which  $\varphi=40$ ,  $N=20$ ,  $a_{BS}=25$  and  $a_{AB}=65$ .

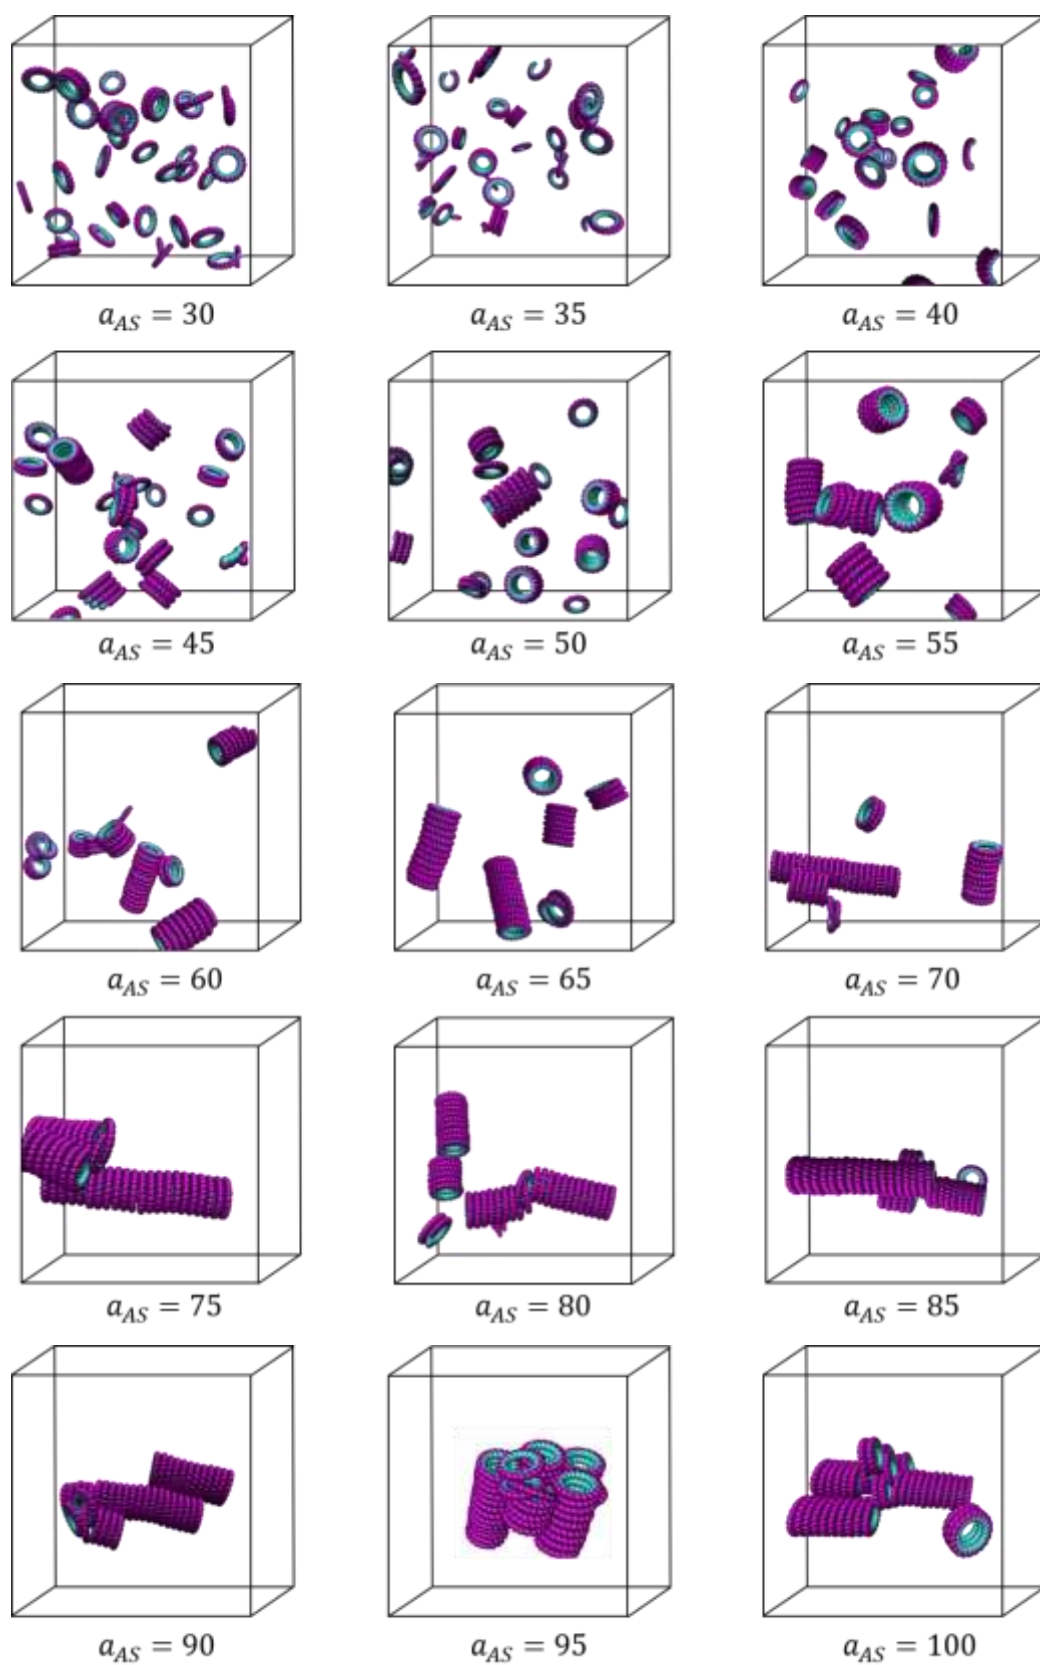

**Figure S11.** The snapshots of last frames extracted from MD trajectories in different values of  $a_{AS}$ , in which  $\varphi=40$ ,  $N=20$ ,  $a_{BS}=25$  and  $a_{AB}=70$ .

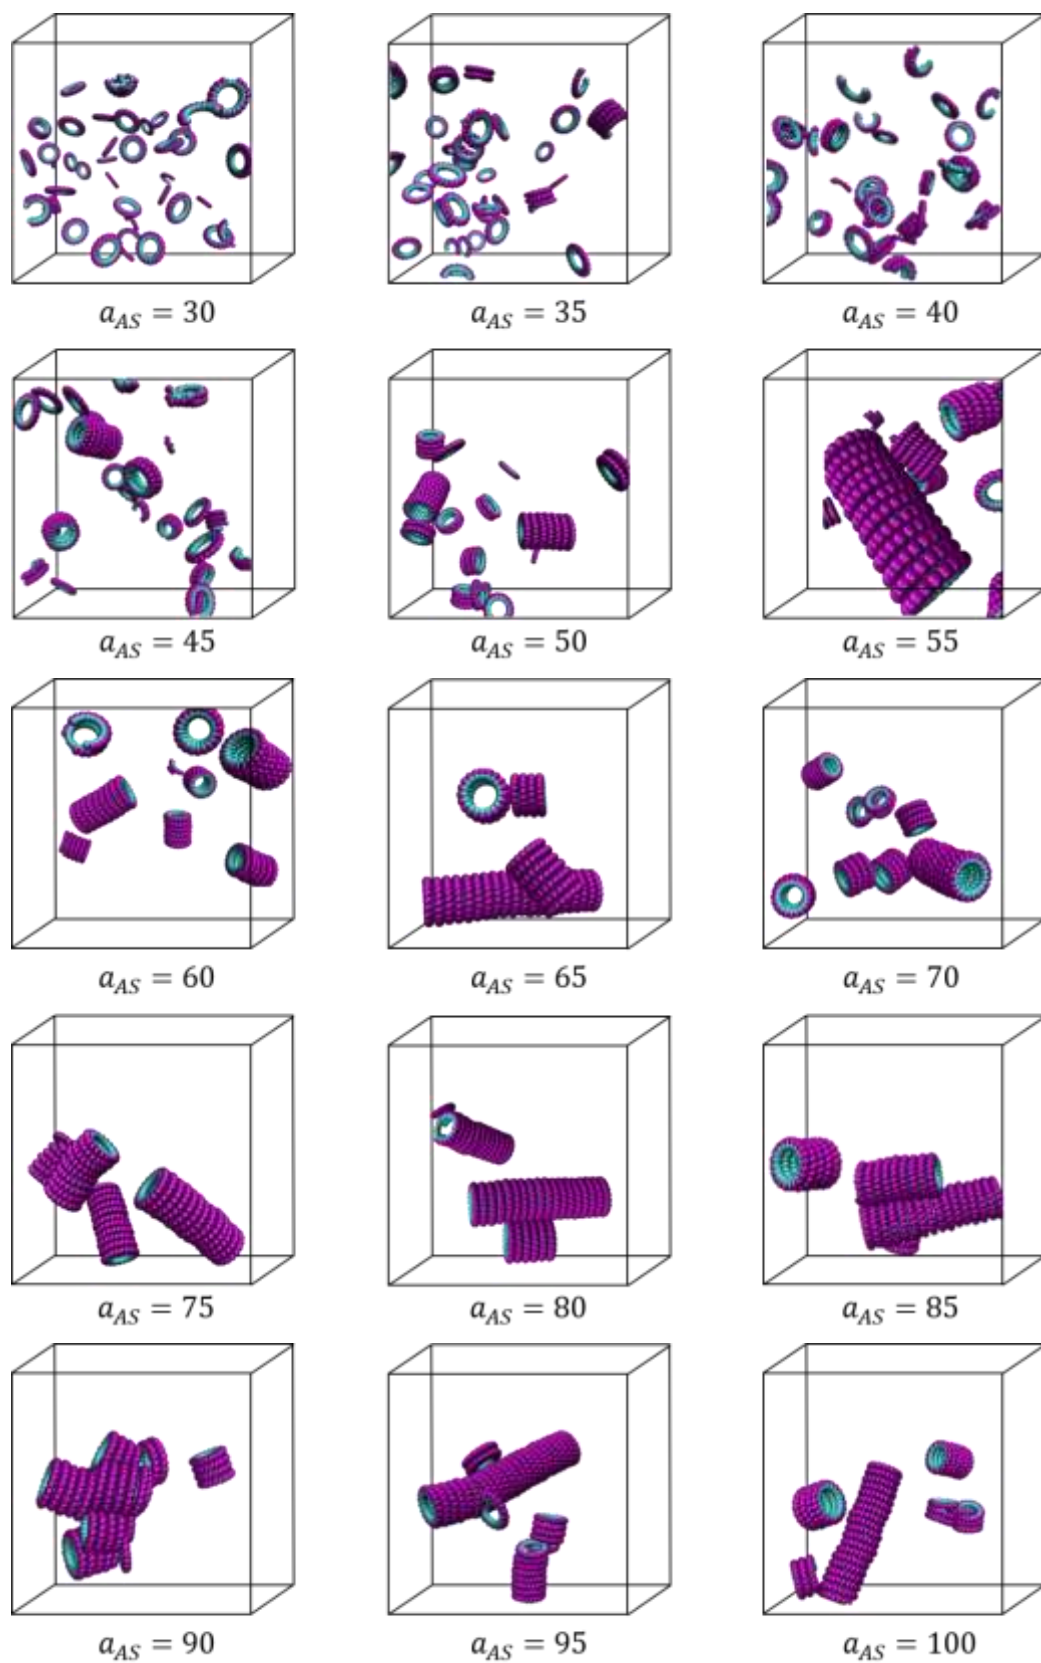

**Figure S12.** The snapshots of last frames extracted from MD trajectories in different values of  $a_{AS}$ , in which  $\varphi=40$ ,  $N=20$ ,  $a_{BS}=25$  and  $a_{AB}=75$ .



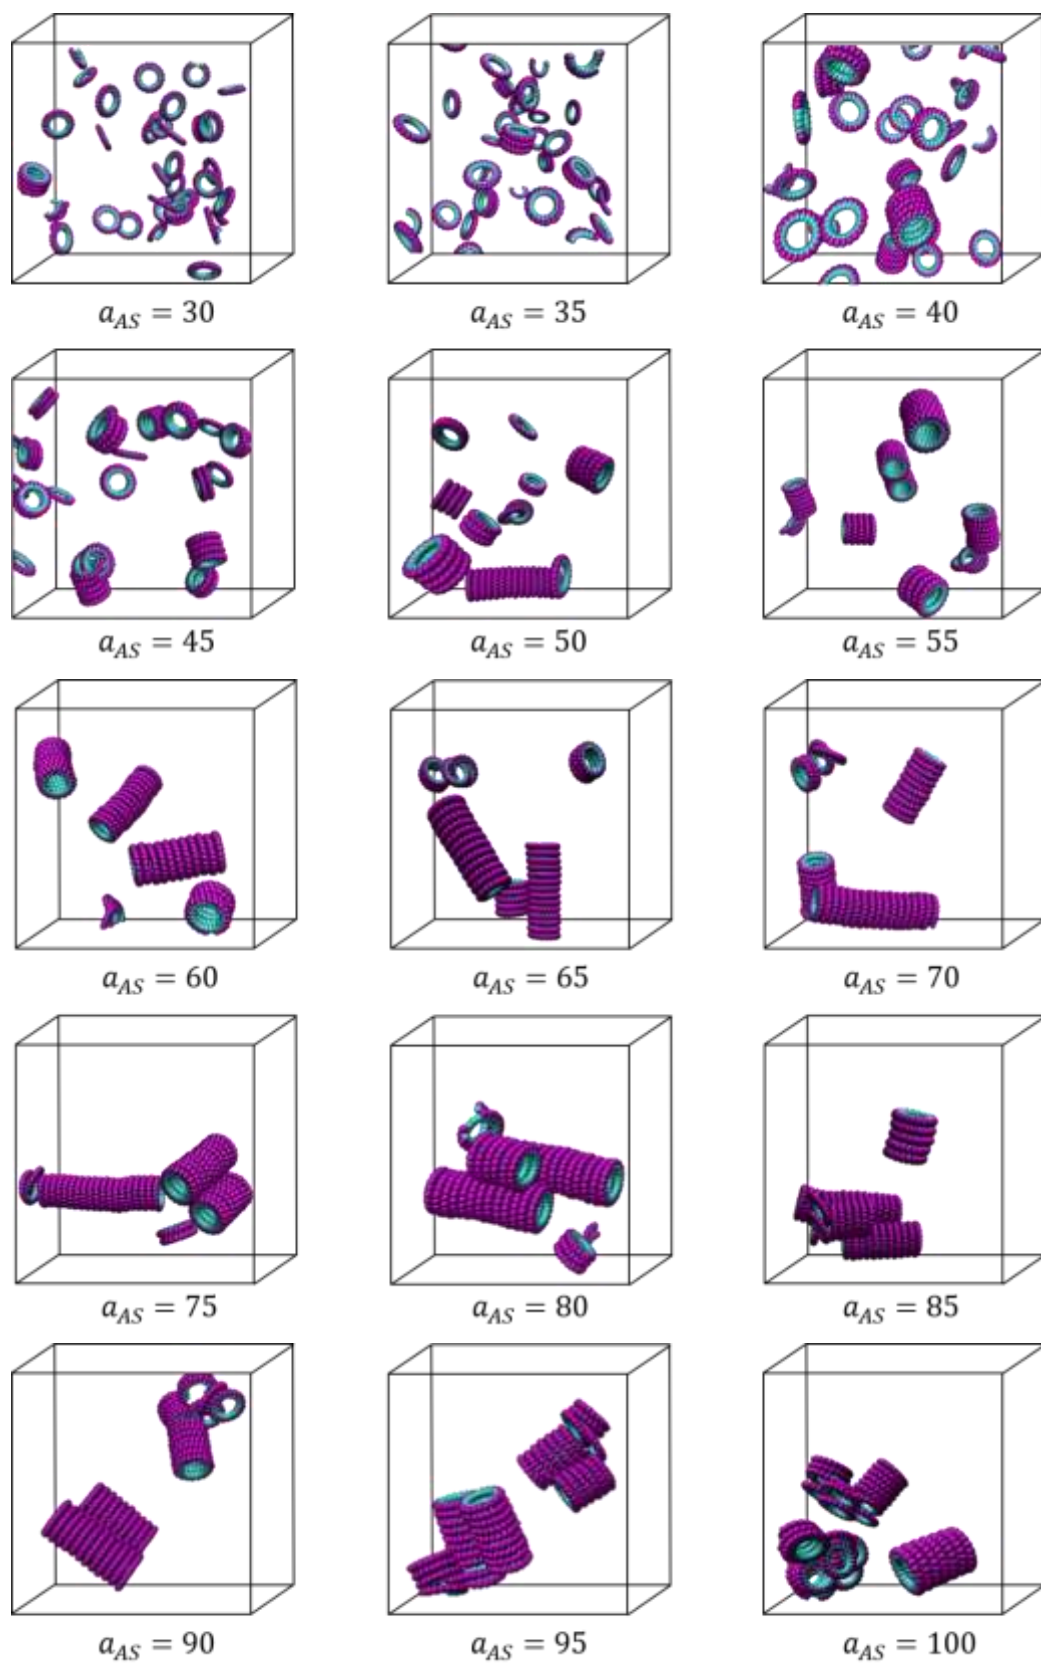

**Figure S13.** The snapshots of last frames extracted from MD trajectories in different values of  $a_{AS}$ , in which  $\varphi=40$ ,  $N=20$ ,  $a_{BS}=25$  and  $a_{AB}=80$ .

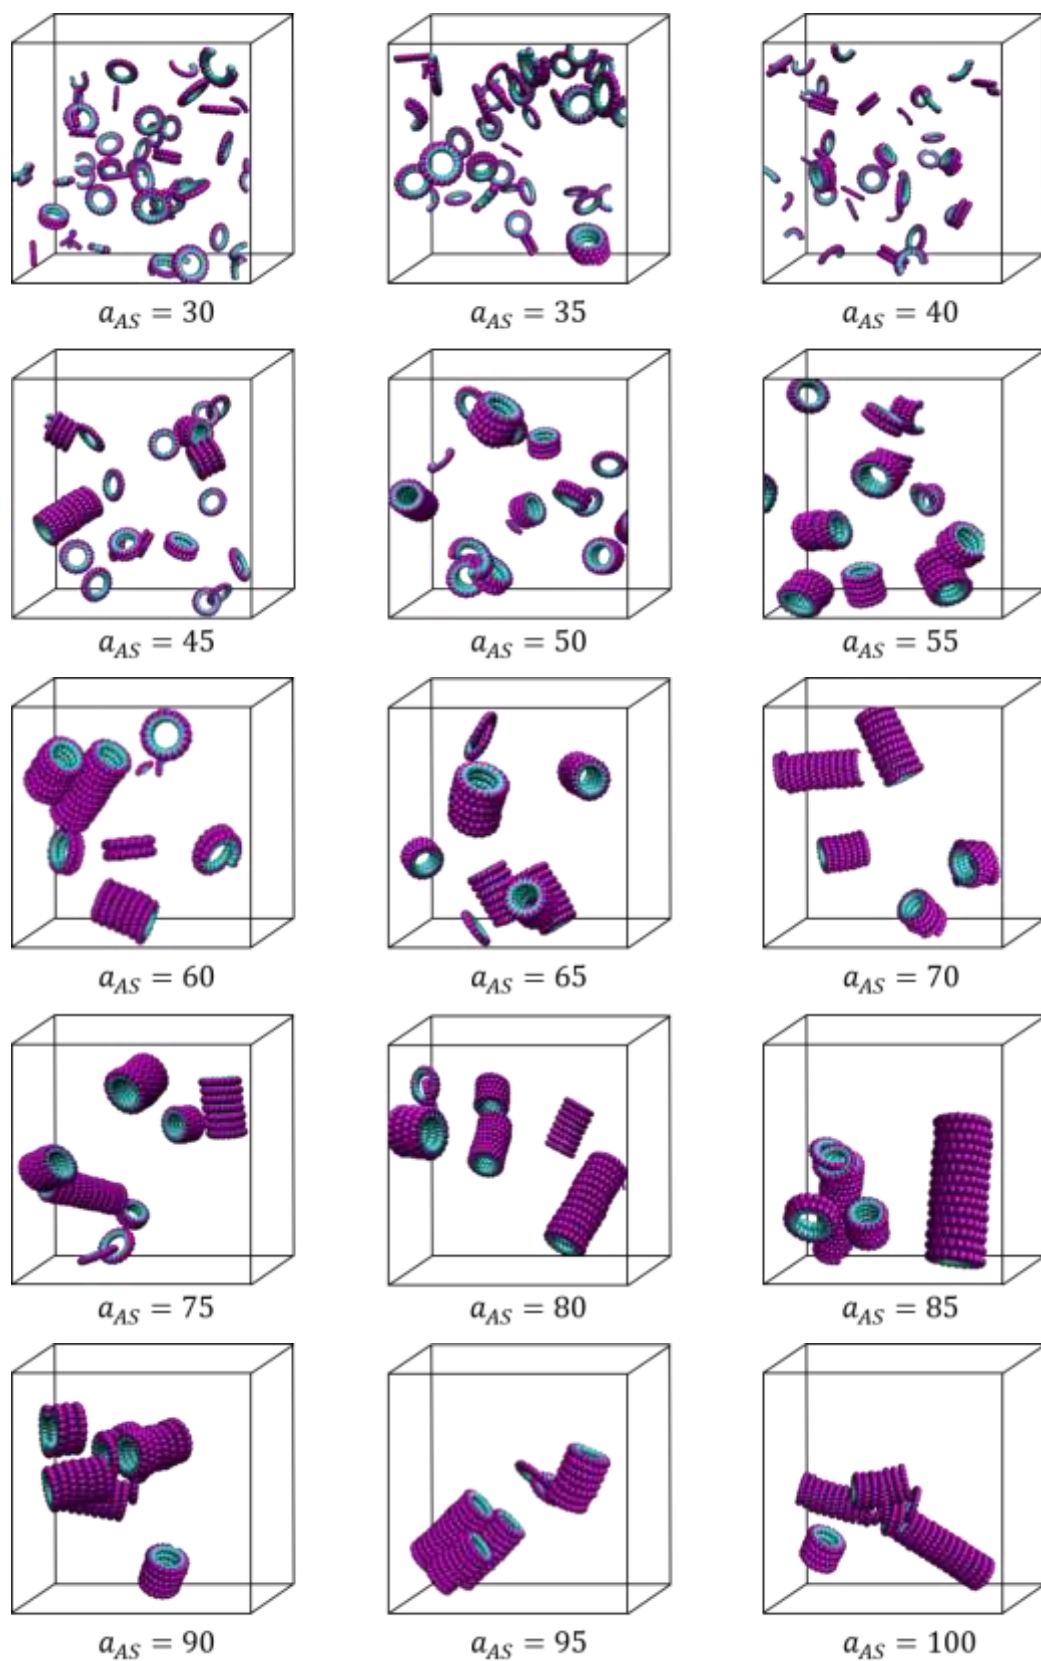

**Figure S14.** The snapshots of last frames extracted from MD trajectories in different values of  $a_{AS}$ , in which  $\varphi=40$ ,  $N=20$ ,  $a_{BS}=25$  and  $a_{AB}=85$ .



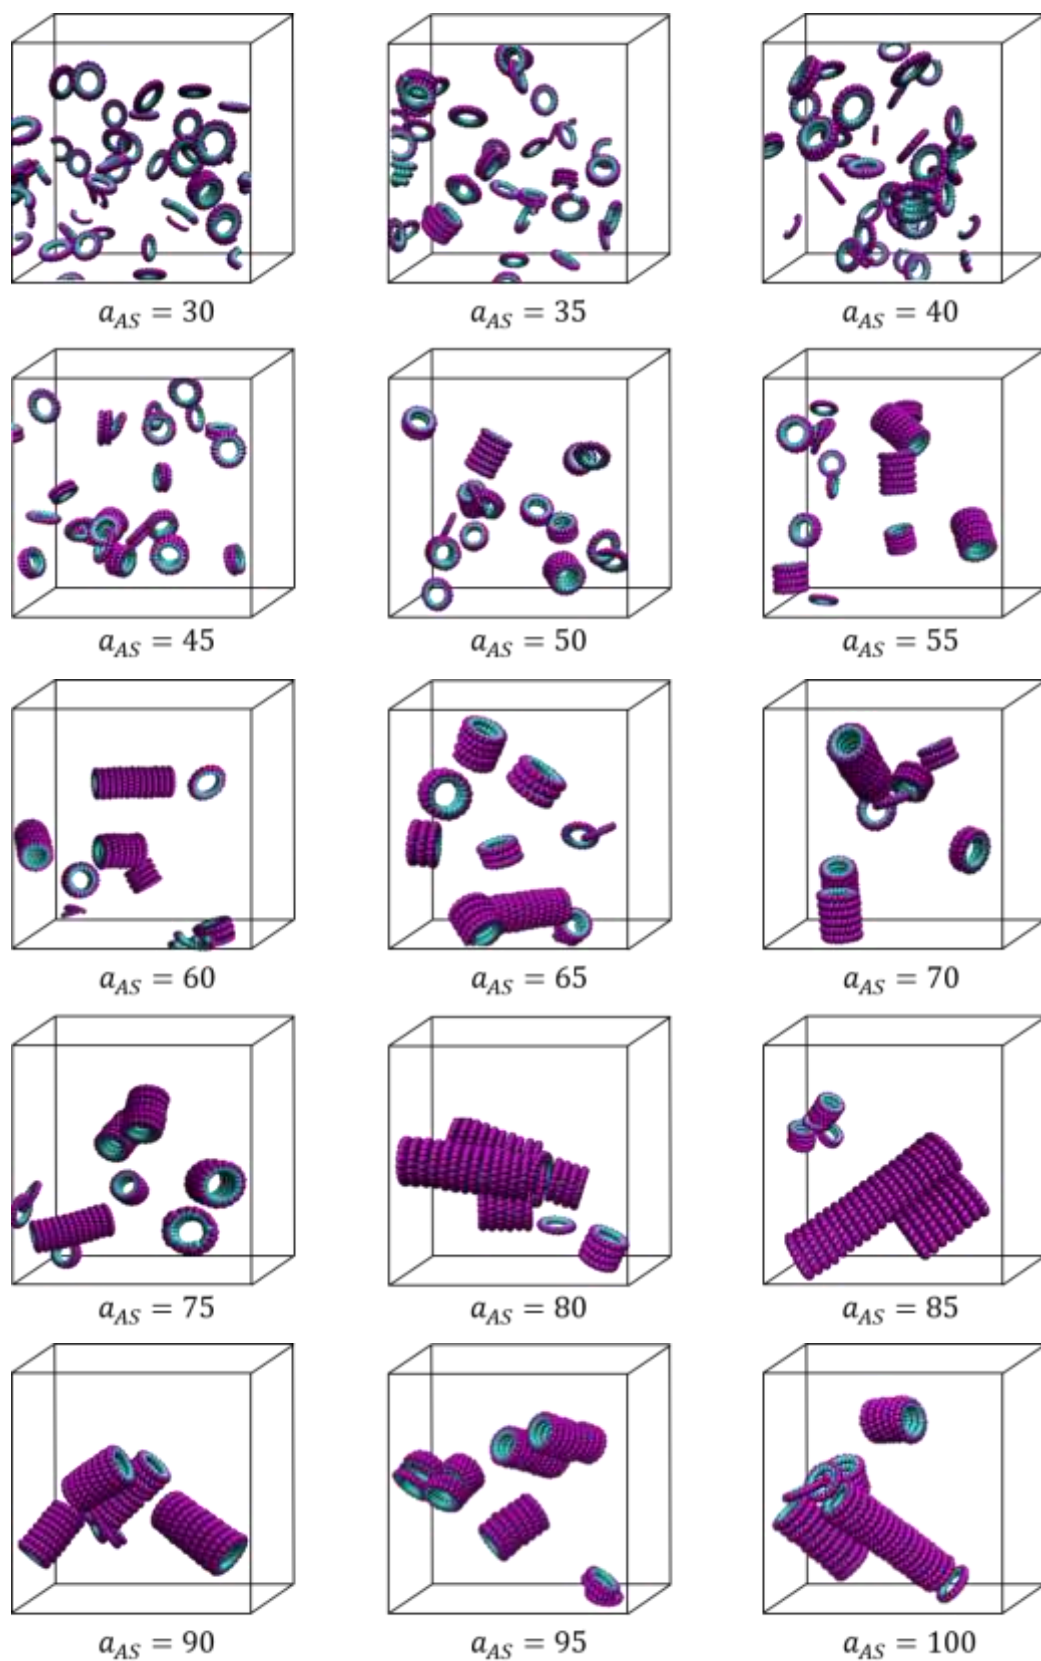

**Figure S15.** The snapshots of last frames extracted from MD trajectories in different values of  $a_{AS}$ , in which  $\varphi=40$ ,  $N=20$ ,  $a_{BS}=25$  and  $a_{AB}=90$ .

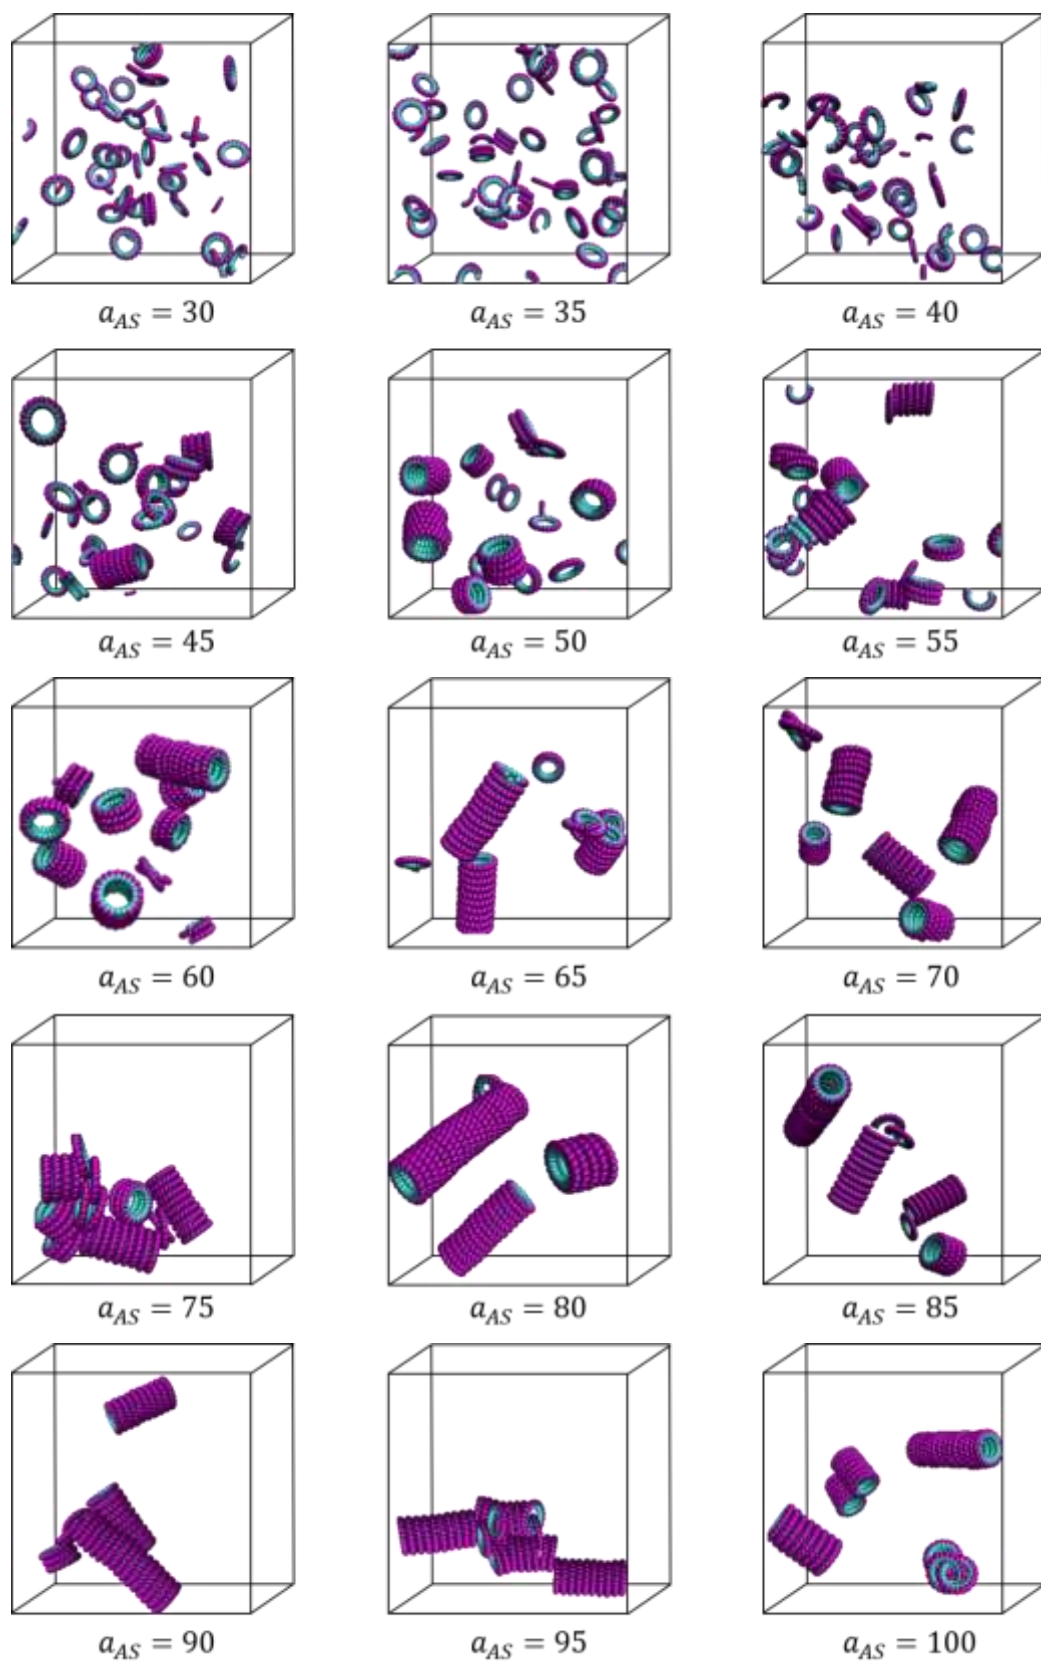

**Figure S16.** The snapshots of last frames extracted from MD trajectories in different values of  $a_{AS}$ , in which  $\varphi=40$ ,  $N=20$ ,  $a_{BS}=25$  and  $a_{AB}=95$ .

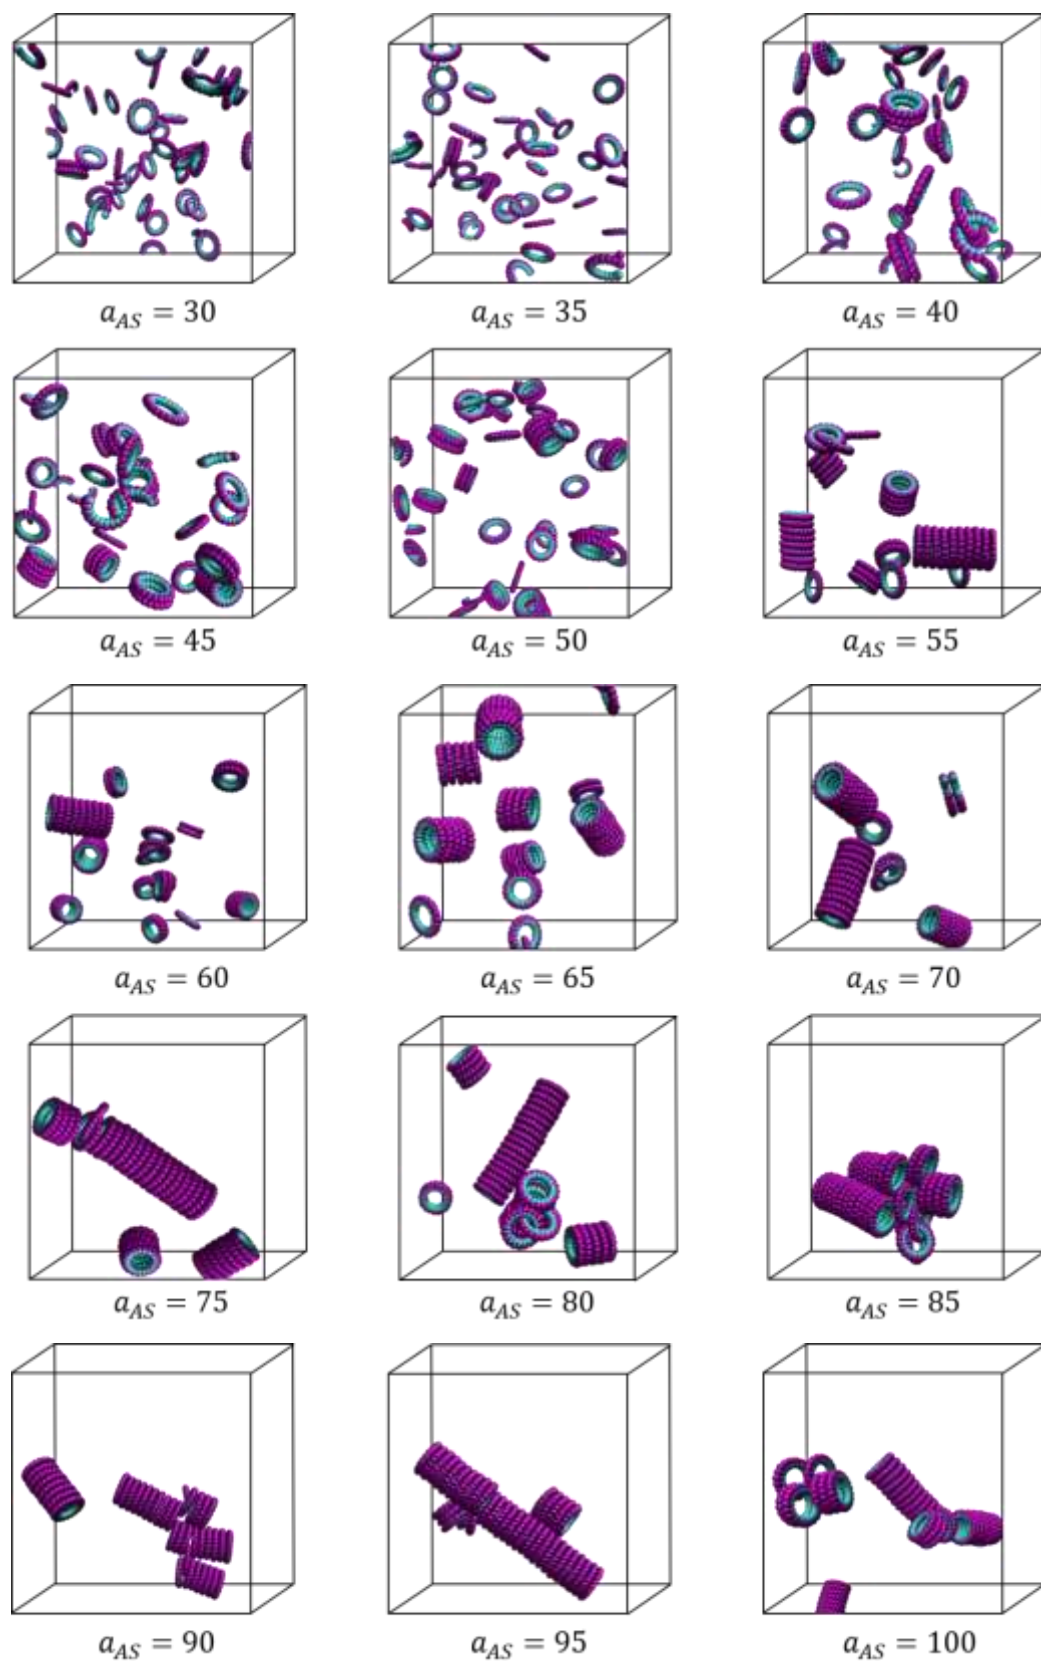

**Figure S17.** The snapshots of last frames extracted from MD trajectories in different values of  $a_{AS}$ , in which  $\varphi=40$ ,  $N=20$ ,  $a_{BS}=25$  and  $a_{AB}=100$ .

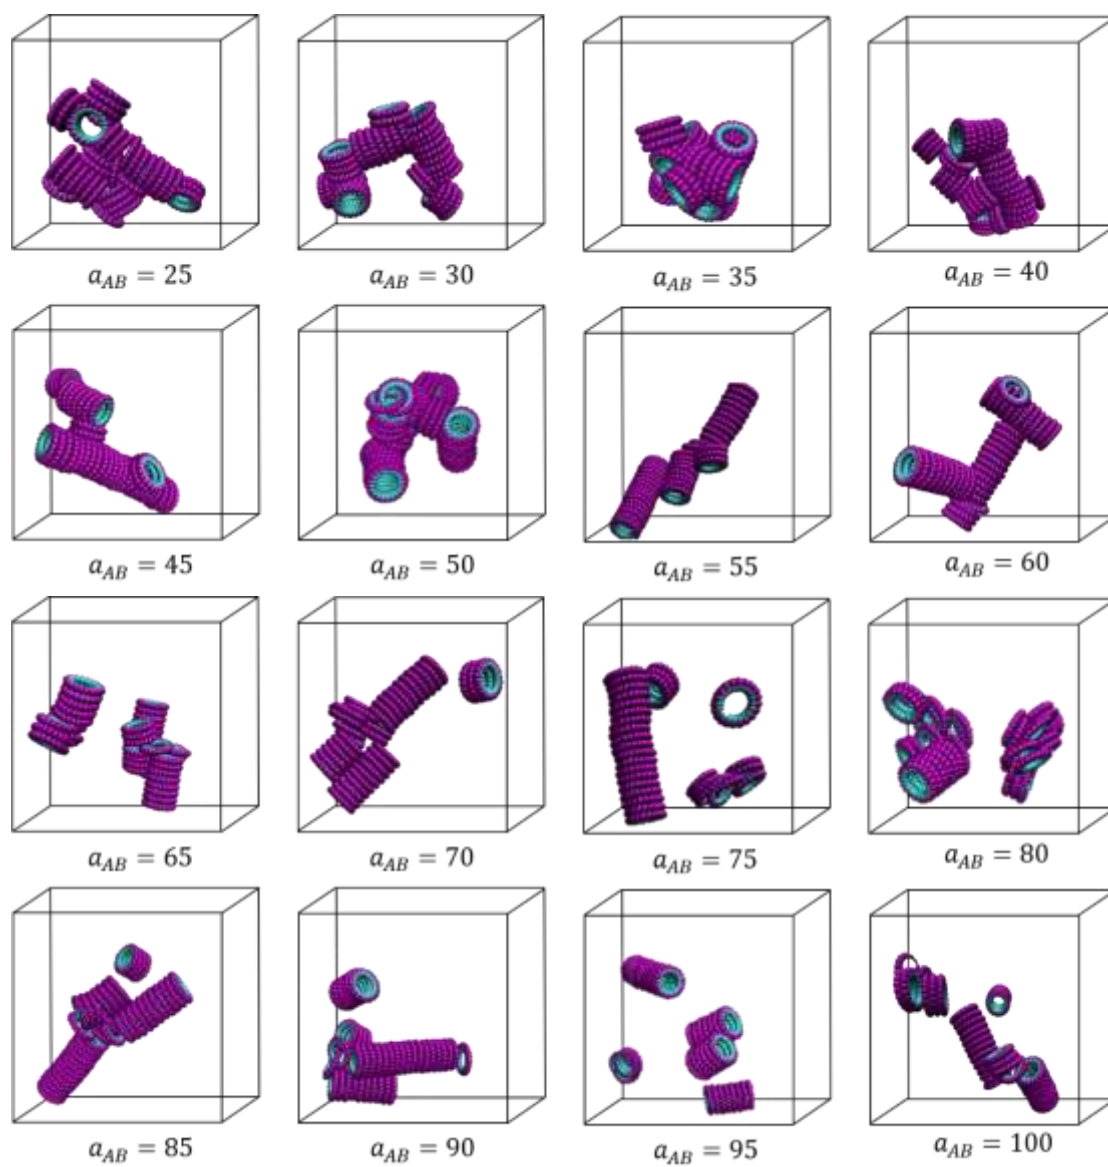

**Figure S18.** The snapshots of last frames extracted from MD trajectories in different values of  $\alpha_{AB}$ , in which  $\varphi=40$ ,  $N=20$ ,  $\alpha_{AS}=100$  and  $\alpha_{BS}=25$ .

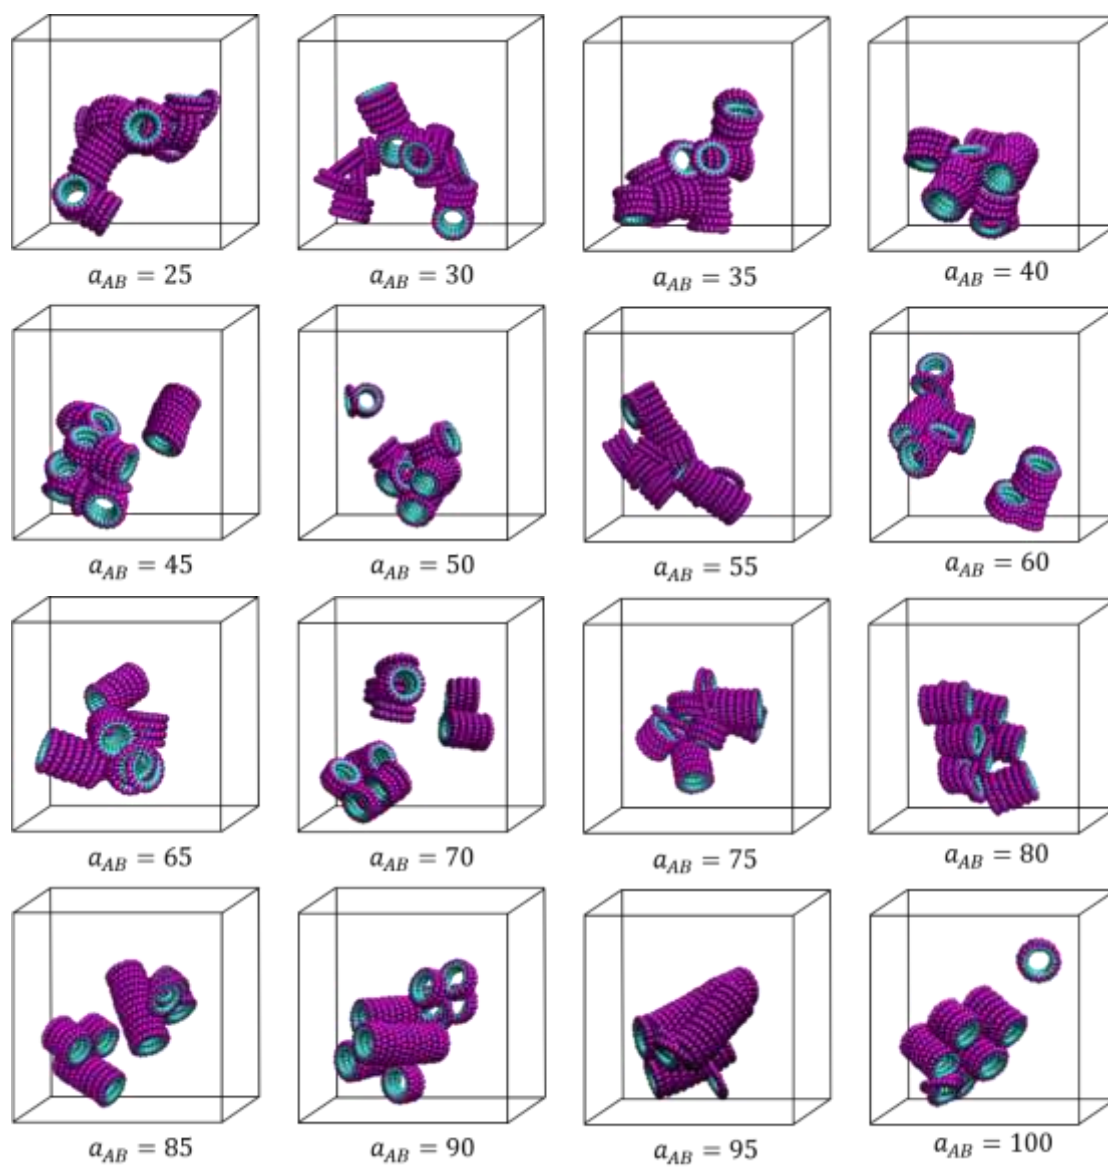

**Figure S19.** The snapshots of last frames extracted from MD trajectories in different values of  $\alpha_{AB}$ , in which  $\varphi=40$ ,  $N=20$ ,  $\alpha_{AS}=100$  and  $\alpha_{BS}=30$ .

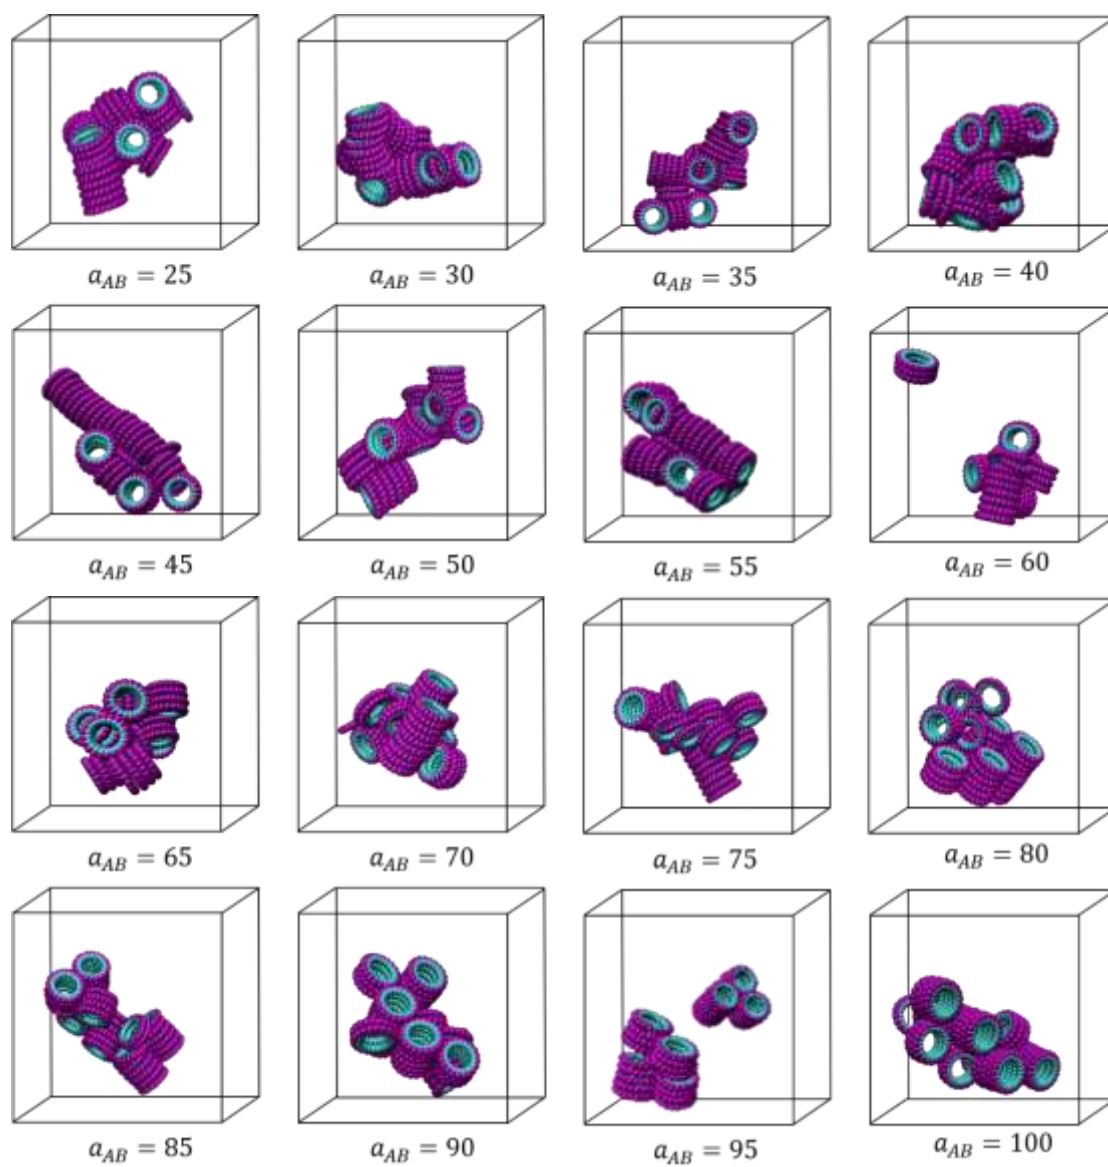

**Figure S20.** The snapshots of last frames extracted from MD trajectories in different values of  $\alpha_{AB}$ , in which  $\varphi=40$ ,  $N=20$ ,  $\alpha_{AS}=100$  and  $\alpha_{BS}=35$ .



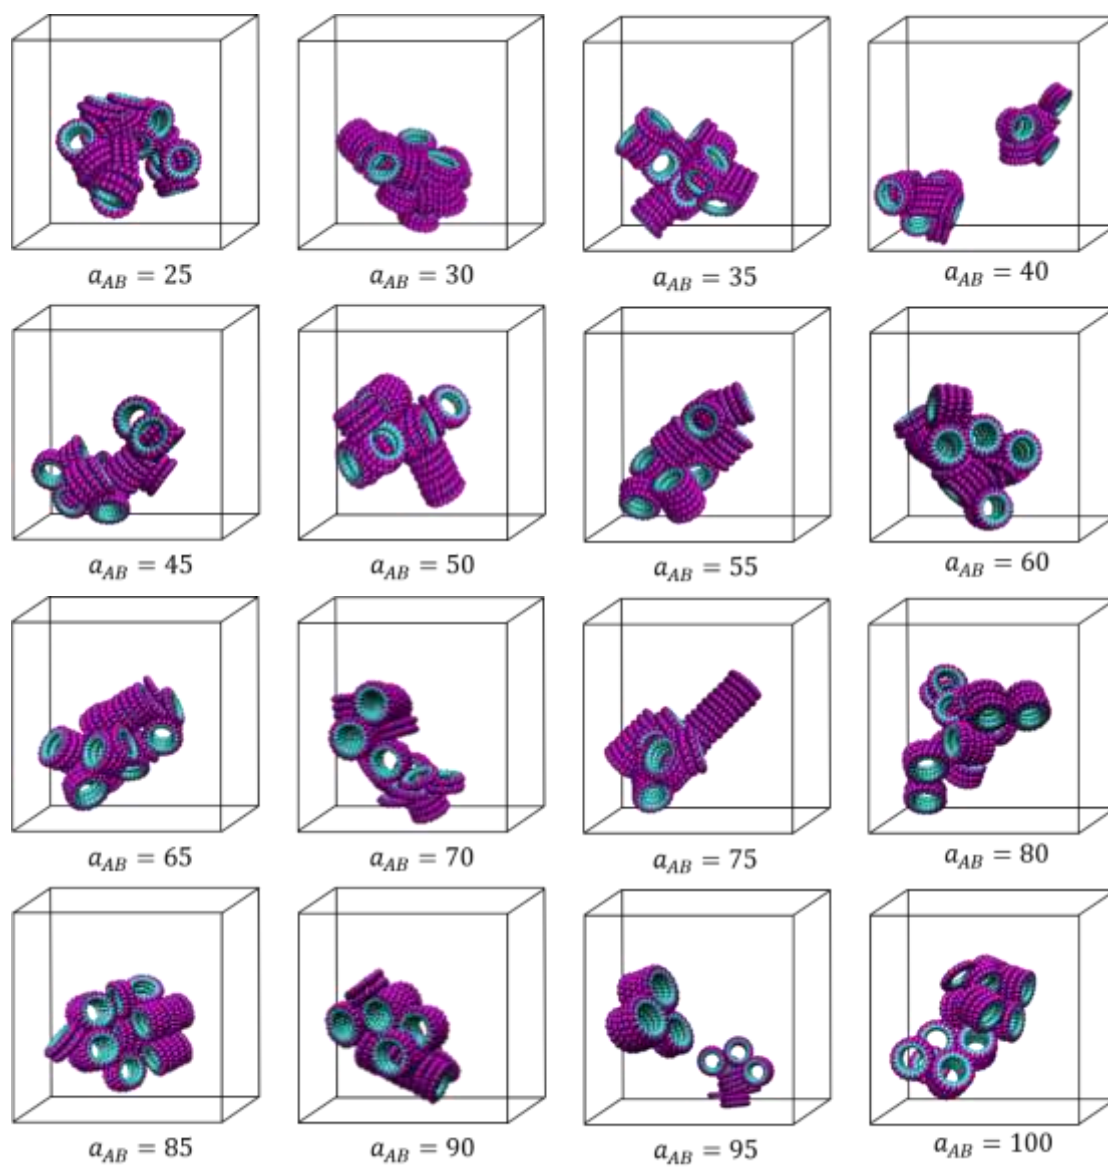

**Figure S21.** The snapshots of last frames extracted from MD trajectories in different values of  $\alpha_{AB}$ , in which  $\varphi=40$ ,  $N=20$ ,  $\alpha_{AS}=100$  and  $\alpha_{BS}=40$ .

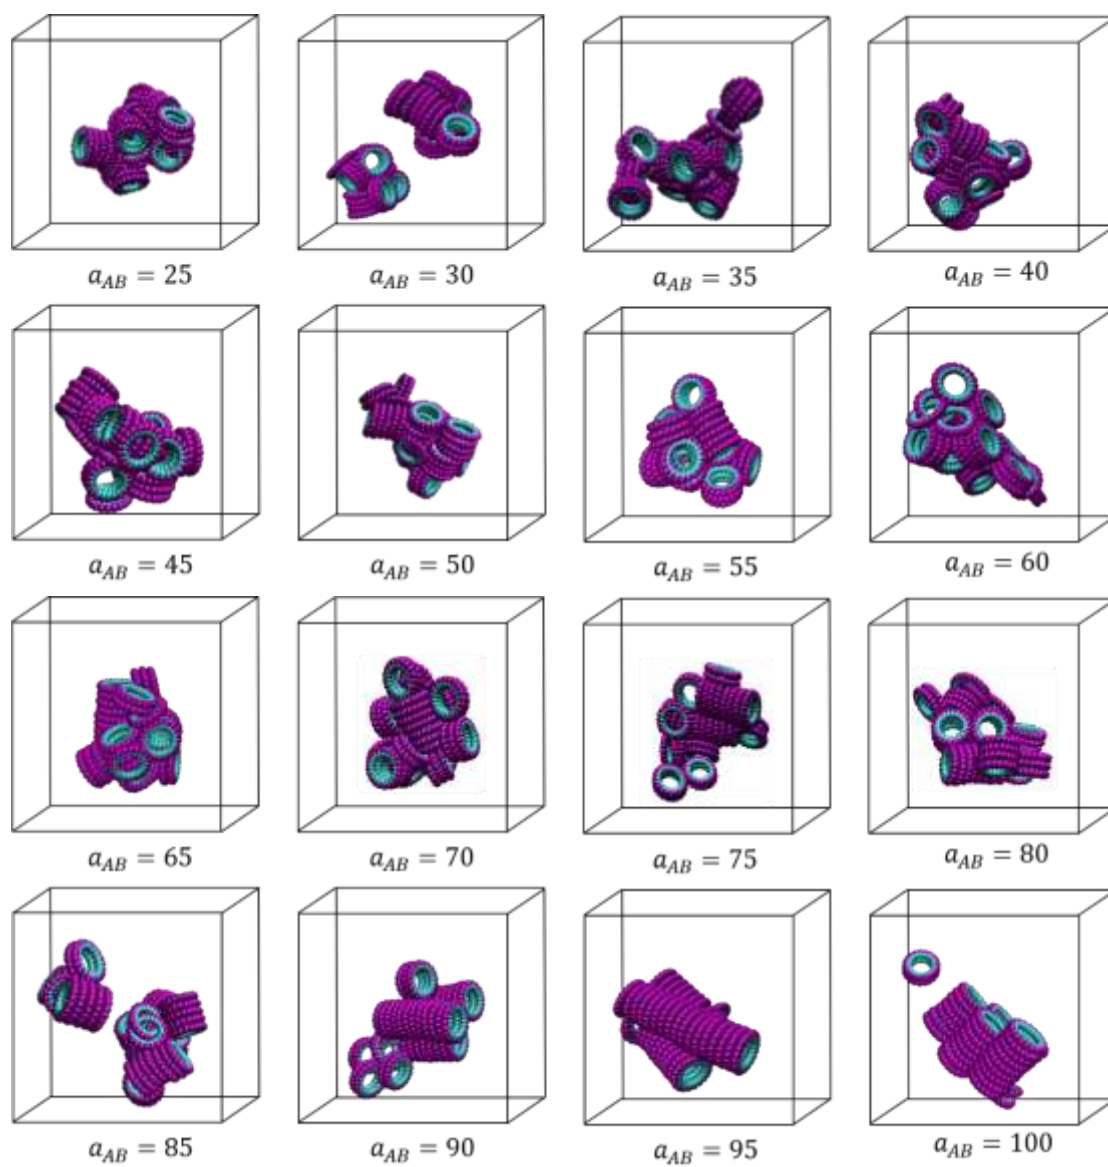

**Figure S22.** The snapshots of last frames extracted from MD trajectories in different values of  $\alpha_{AB}$ , in which  $\varphi=40$ ,  $N=20$ ,  $\alpha_{AS}=100$  and  $\alpha_{BS}=45$ .



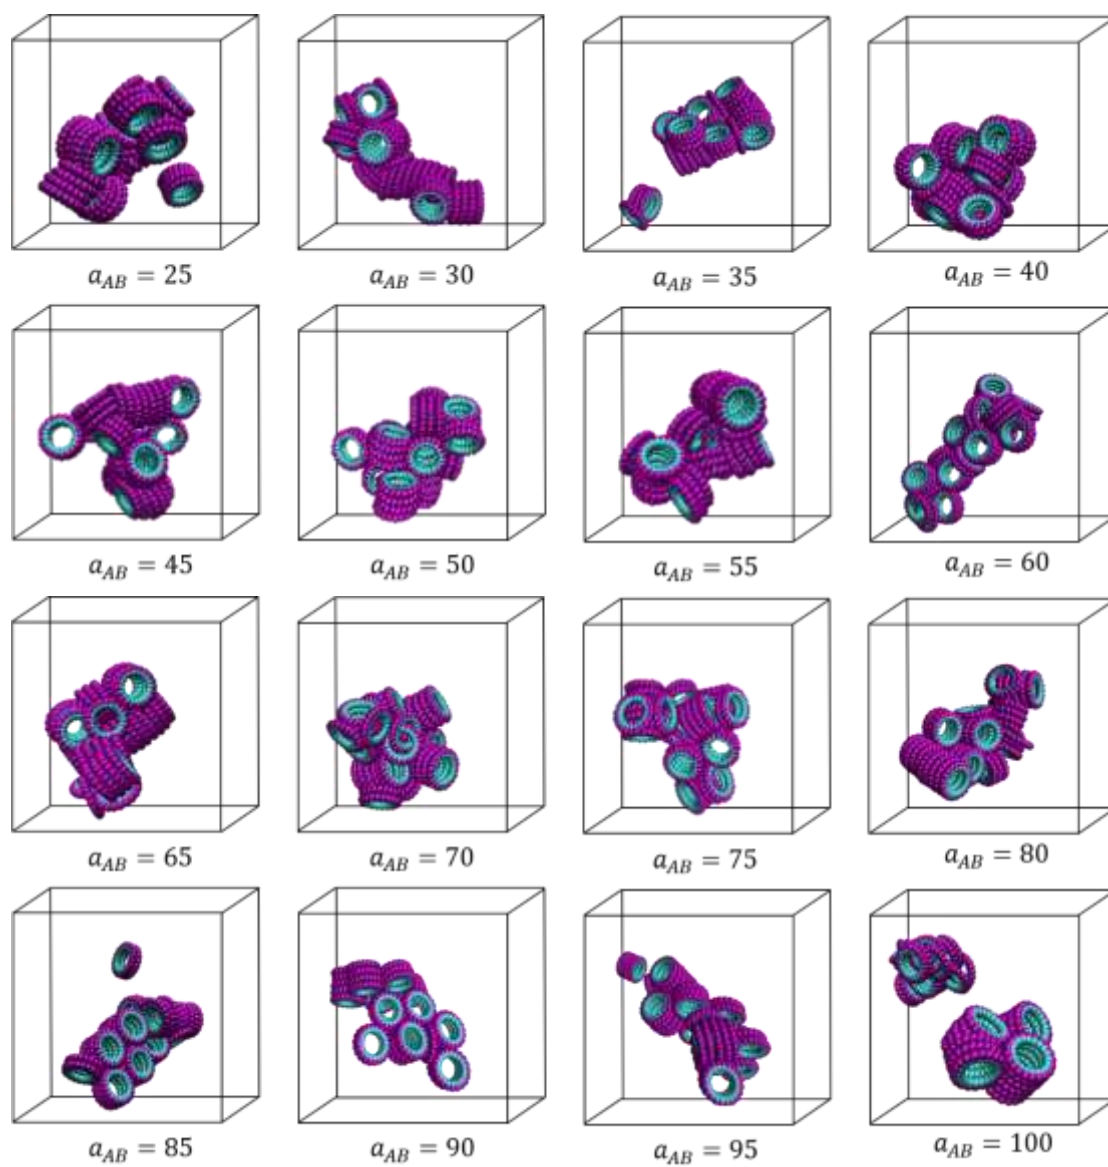

**Figure S23.** The snapshots of last frames extracted from MD trajectories in different values of  $\alpha_{AB}$ , in which  $\varphi=40$ ,  $N=20$ ,  $\alpha_{AS}=100$  and  $\alpha_{BS}=50$ .

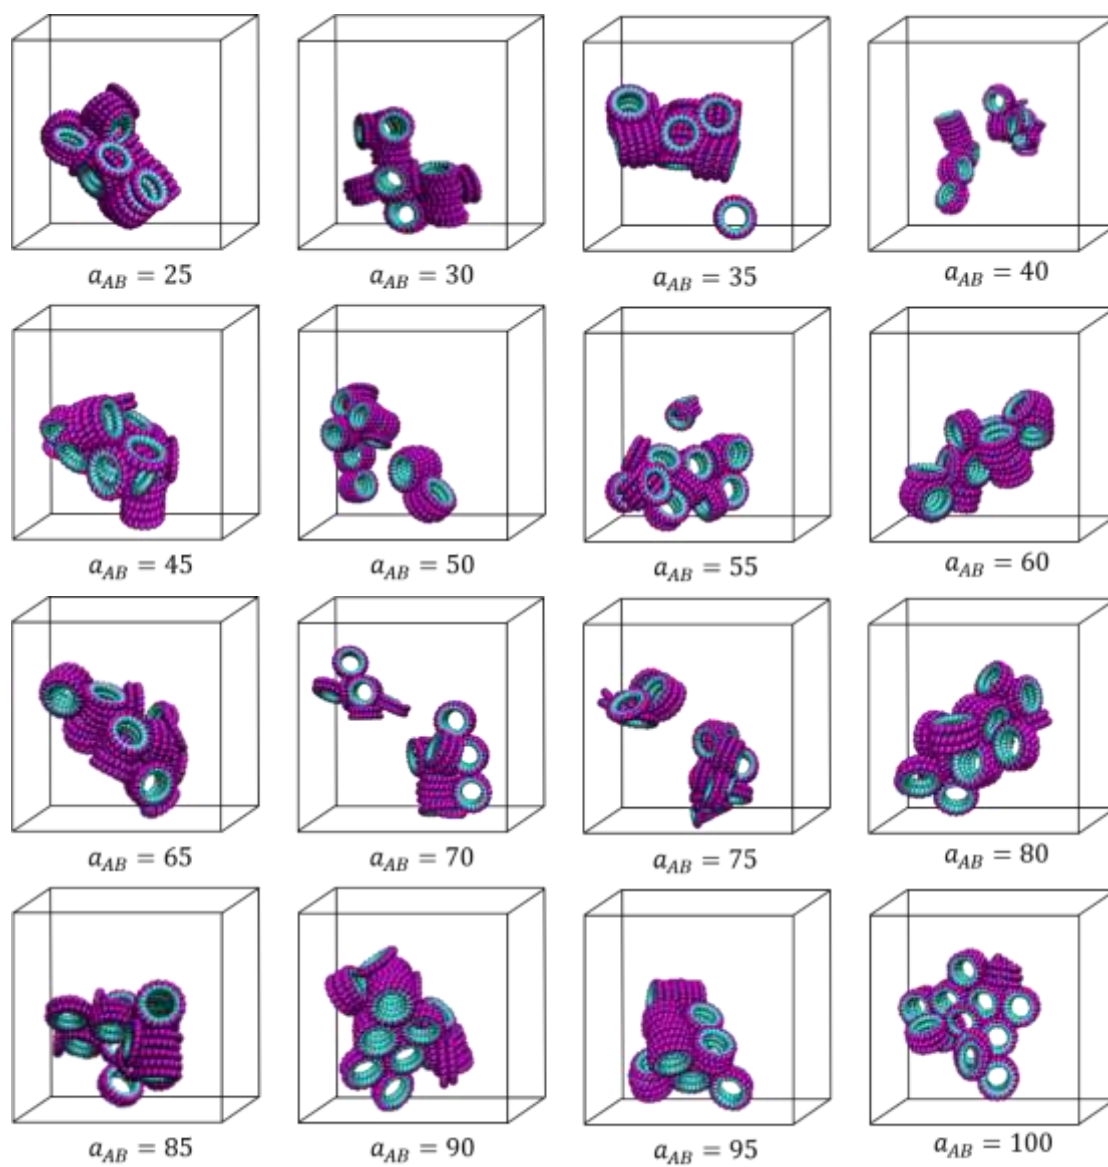

**Figure S24.** The snapshots of last frames extracted from MD trajectories in different values of  $a_{AB}$ , in which  $\varphi=40$ ,  $N=20$ ,  $a_{AS}=100$  and  $a_{BS}=55$ .

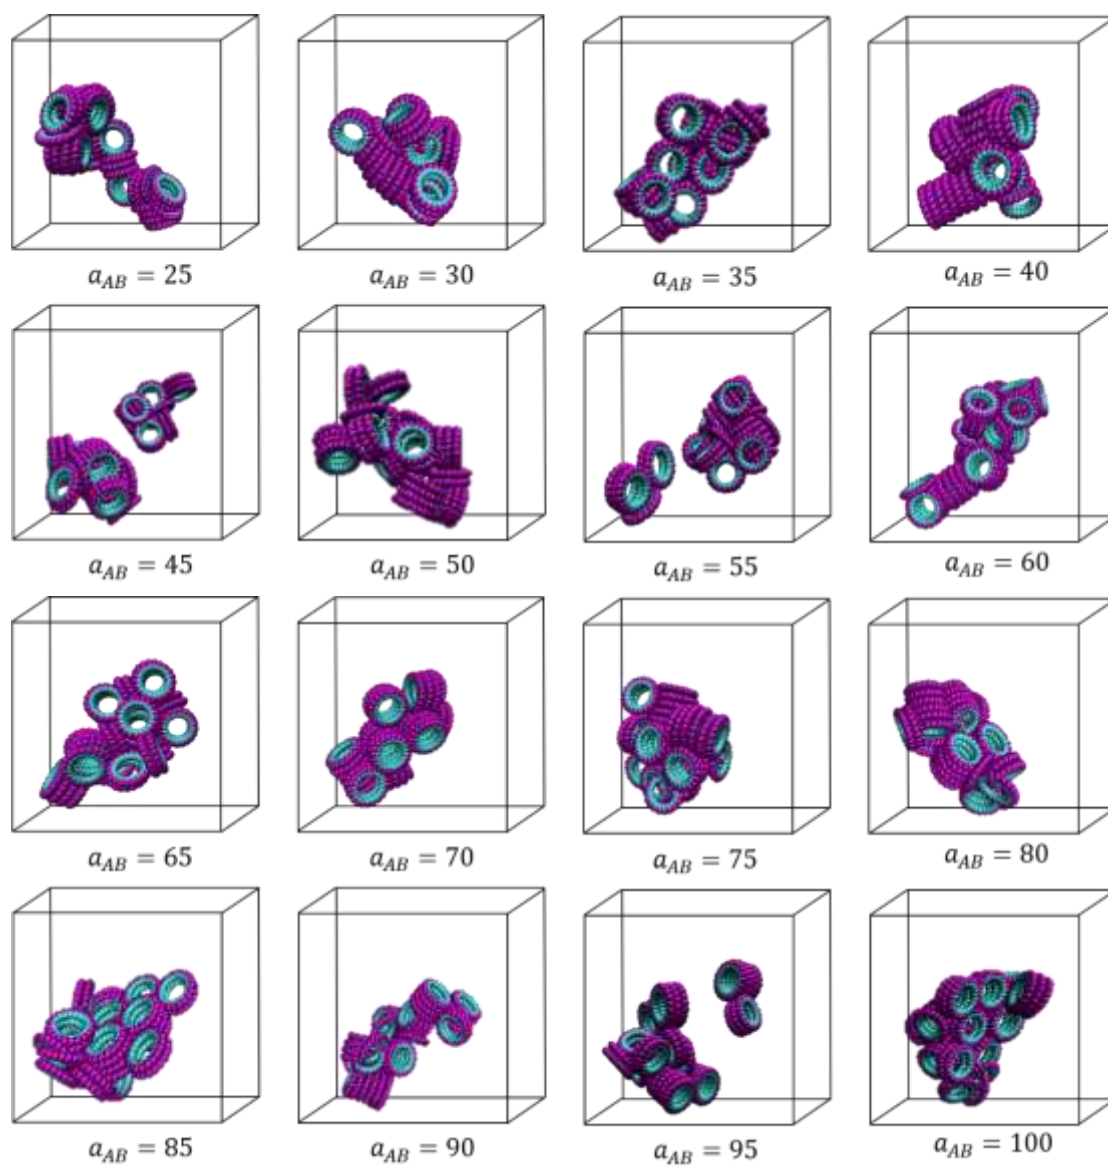

**Figure S25.** The snapshots of last frames extracted from MD trajectories in different values of  $\alpha_{AB}$ , in which  $\varphi=40$ ,  $N=20$ ,  $\alpha_{AS}=100$  and  $\alpha_{BS}=60$ .

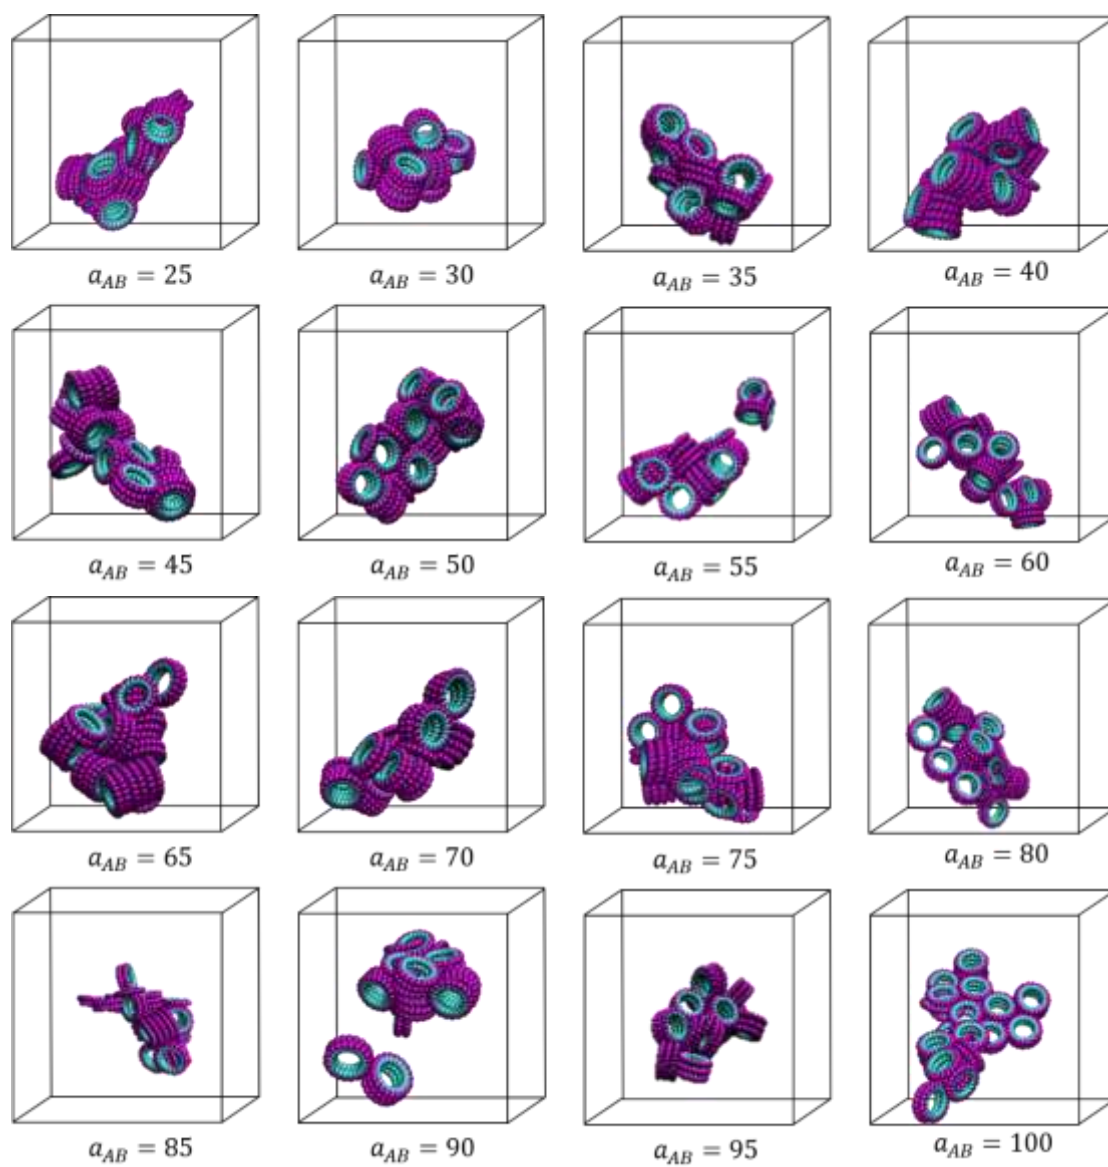

**Figure S26.** The snapshots of last frames extracted from MD trajectories in different values of  $\alpha_{AB}$ , in which  $\varphi=40$ ,  $N=20$ ,  $\alpha_{AS}=100$  and  $\alpha_{BS}=65$ .

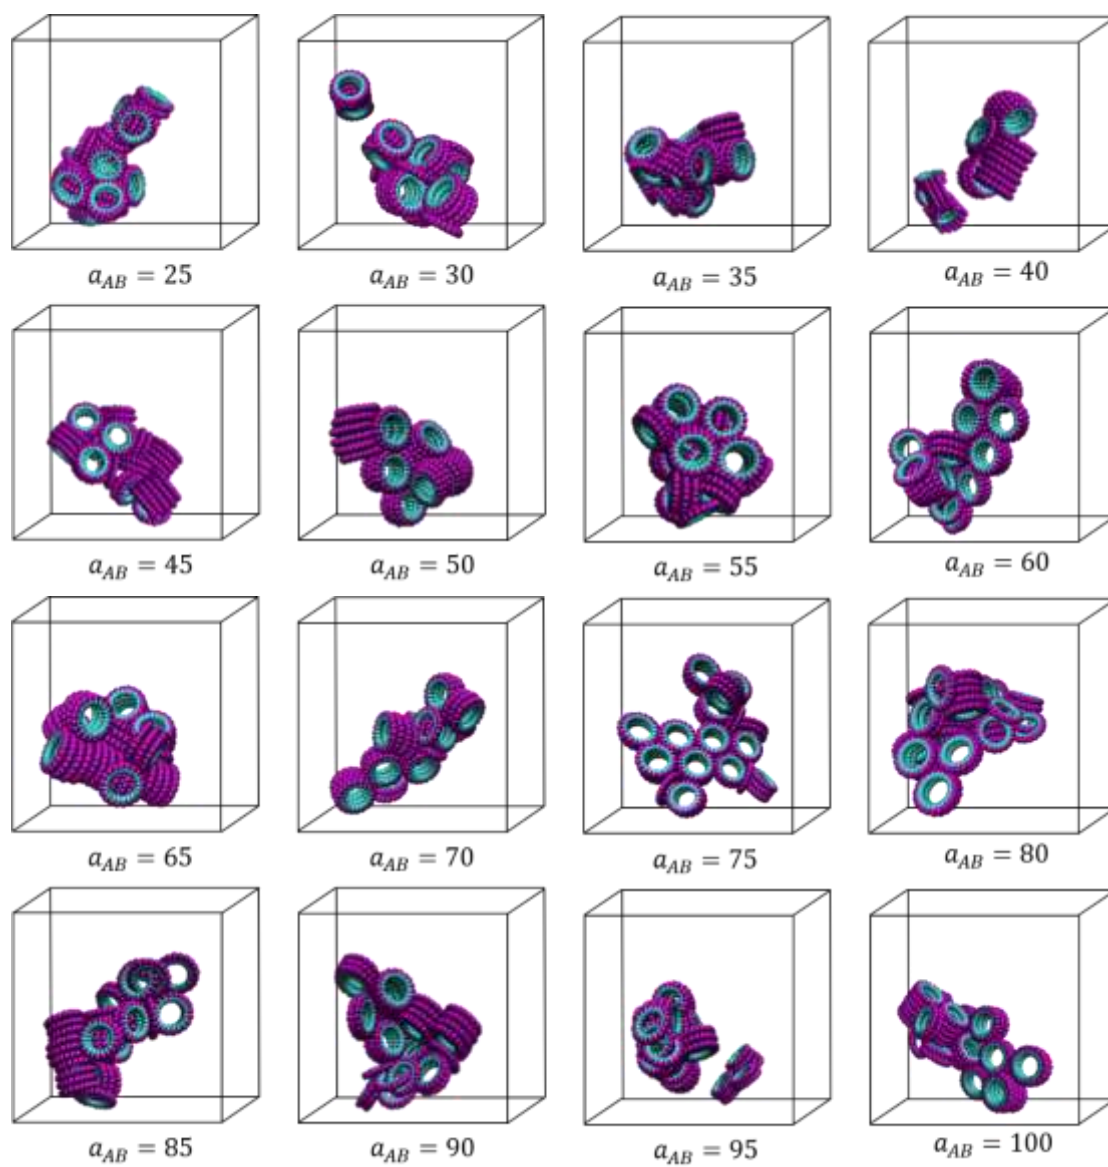

**Figure S27.** The snapshots of last frames extracted from MD trajectories in different values of  $\alpha_{AB}$ , in which  $\varphi=40$ ,  $N=20$ ,  $\alpha_{AS}=100$  and  $\alpha_{BS}=70$ .

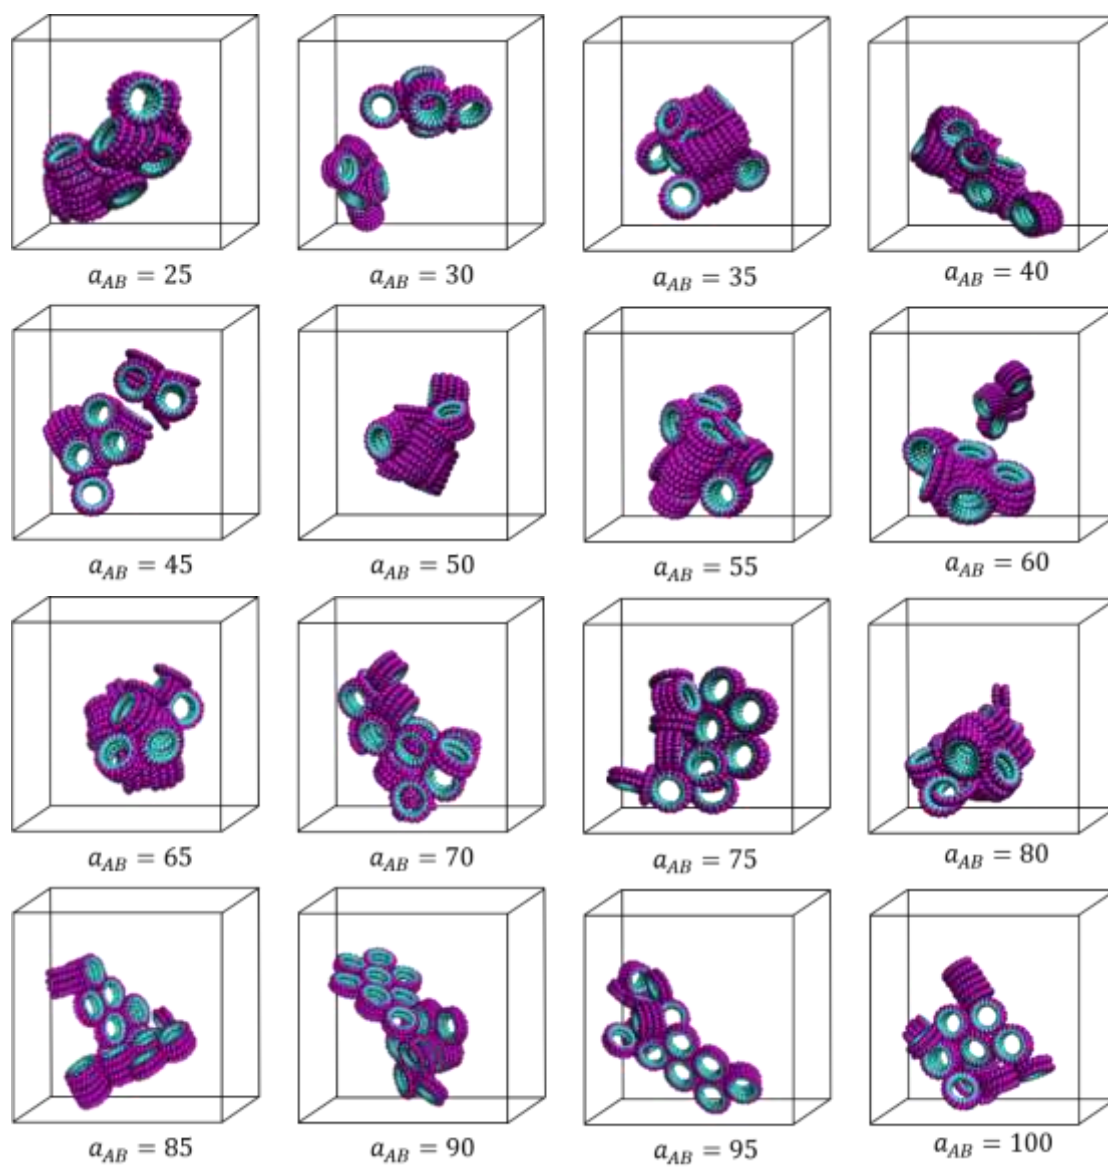

**Figure S28.** The snapshots of last frames extracted from MD trajectories in different values of  $\alpha_{AB}$ , in which  $\varphi=40$ ,  $N=20$ ,  $\alpha_{AS}=100$  and  $\alpha_{BS}=75$ .



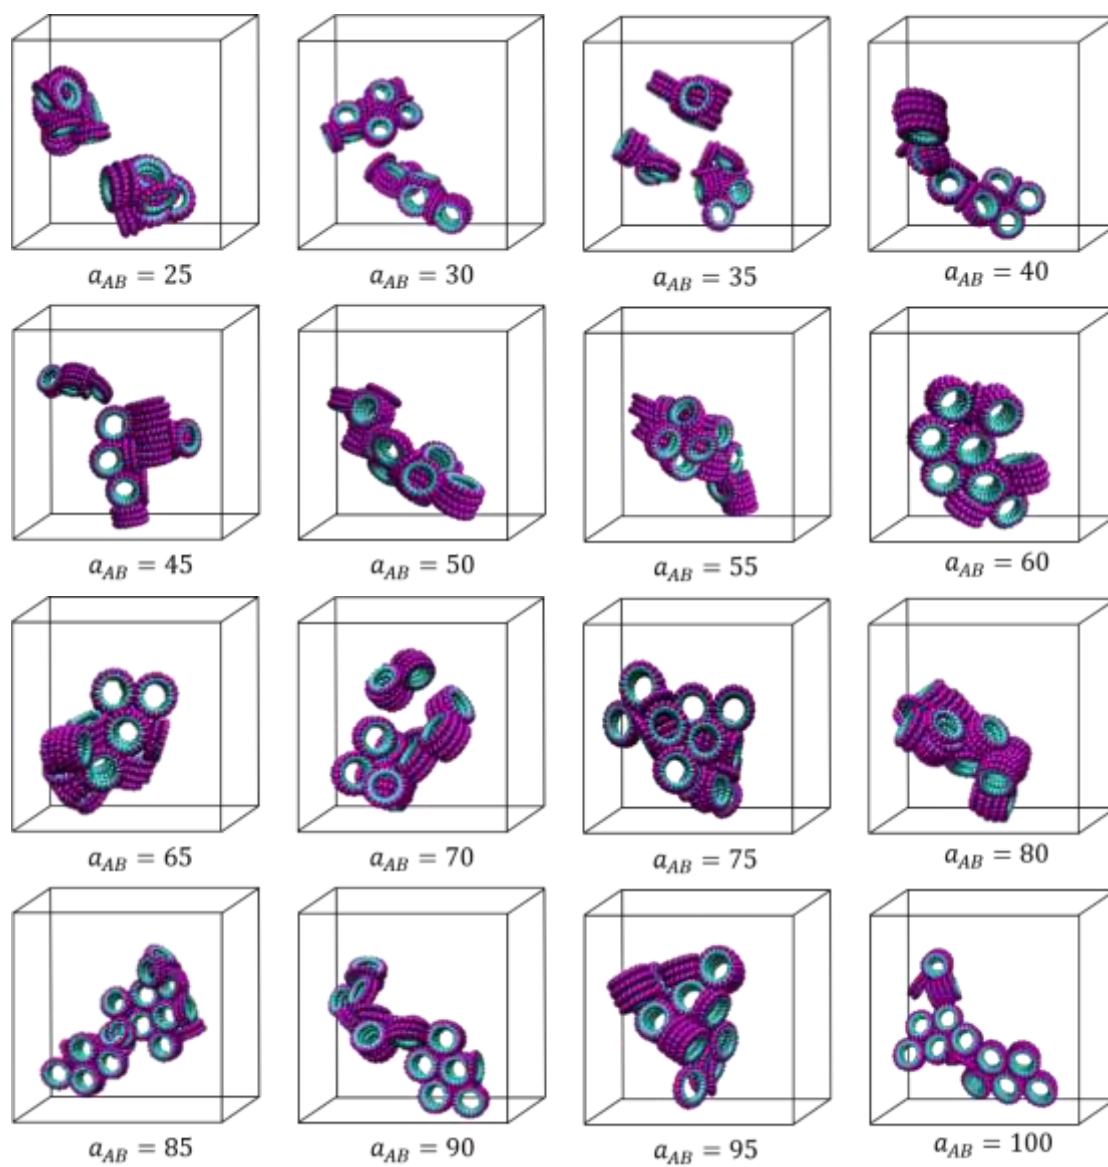

**Figure S29.** The snapshots of last frames extracted from MD trajectories in different values of  $a_{AB}$ , in which  $\varphi=40$ ,  $N=20$ ,  $a_{AS}=100$  and  $a_{BS}=80$ .

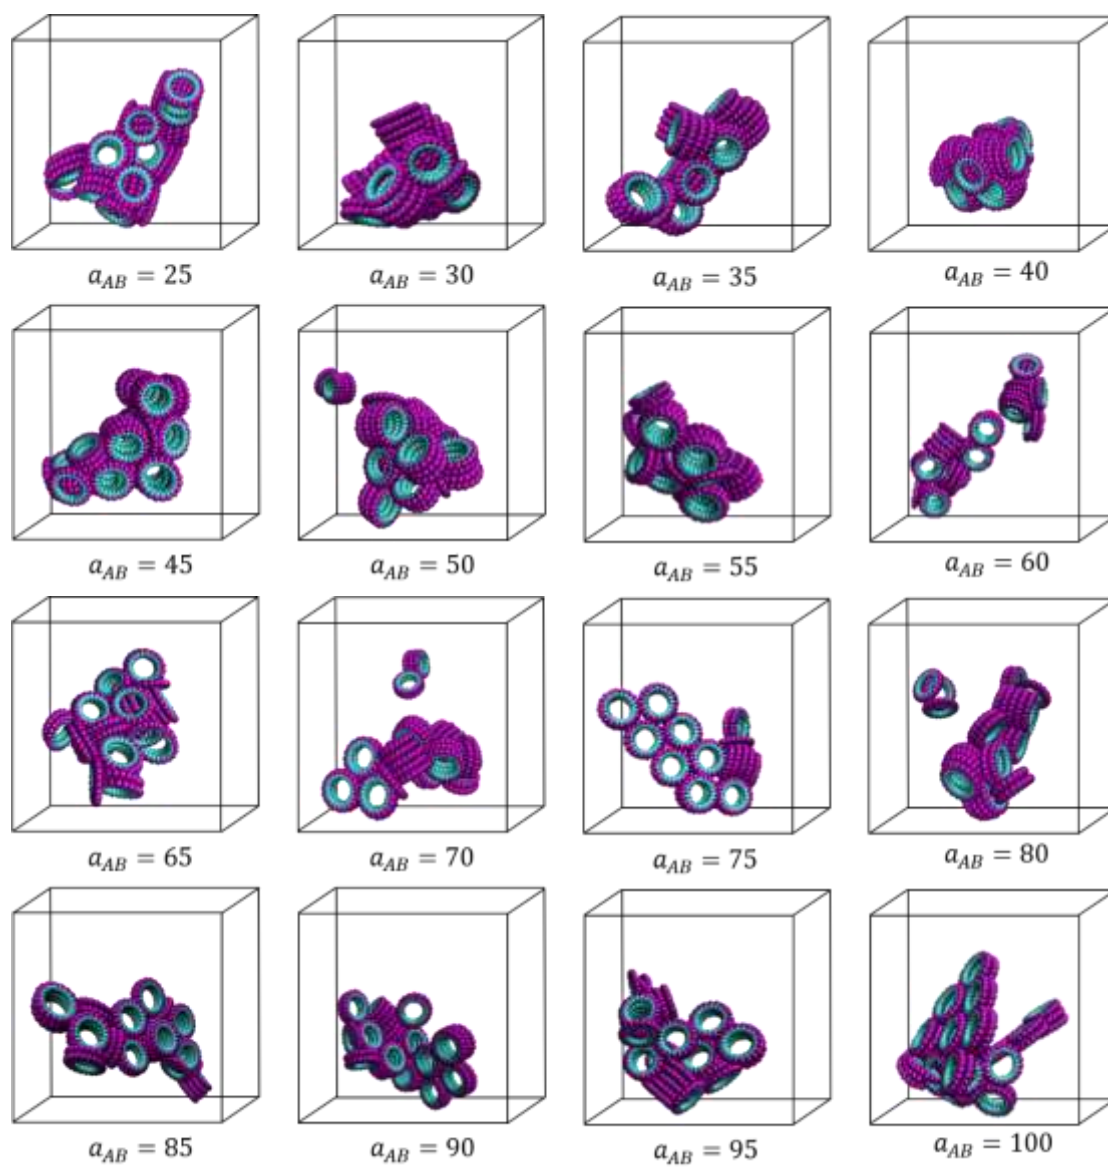

**Figure S30.** The snapshots of last frames extracted from MD trajectories in different values of  $\alpha_{AB}$ , in which  $\varphi=40$ ,  $N=20$ ,  $\alpha_{AS}=100$  and  $\alpha_{BS}=85$ .



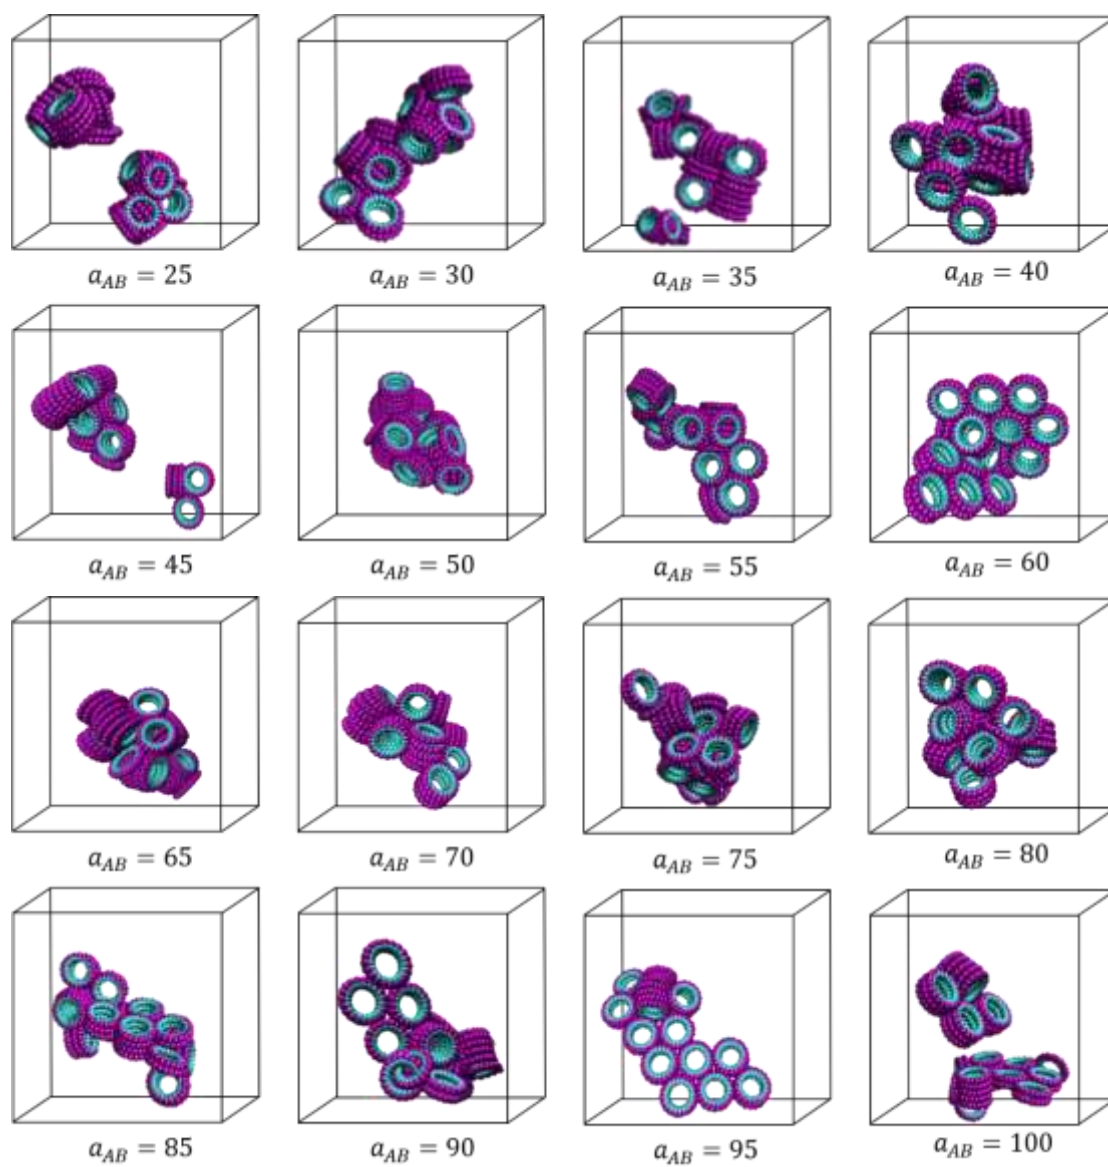

**Figure S31.** The snapshots of last frames extracted from MD trajectories in different values of  $a_{AB}$ , in which  $\varphi=40$ ,  $N=20$ ,  $a_{AS}=100$  and  $a_{BS}=90$ .

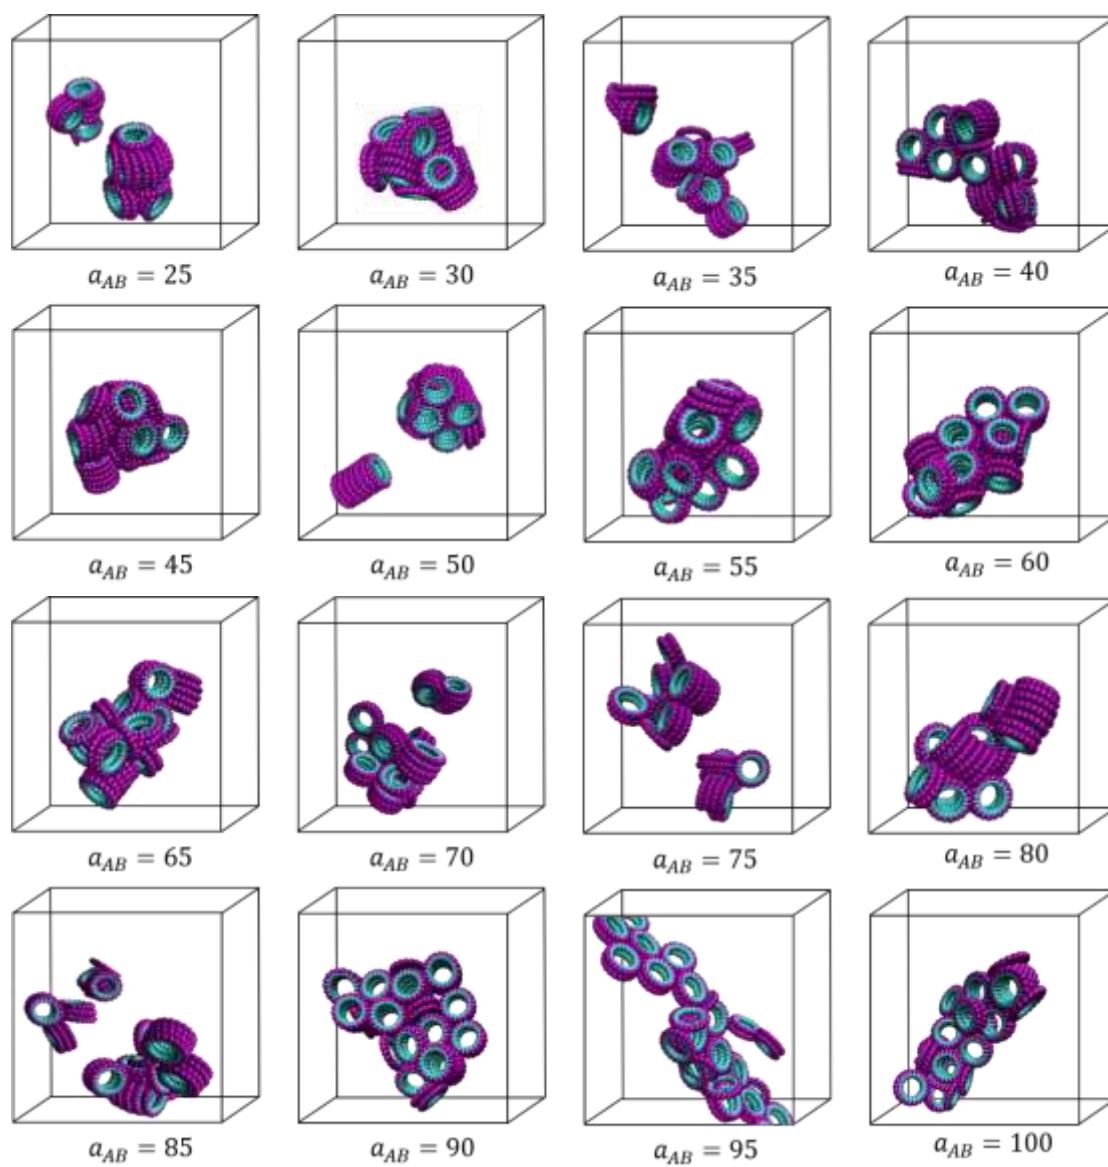

**Figure S32.** The snapshots of last frames extracted from MD trajectories in different values of  $\alpha_{AB}$ , in which  $\varphi=40$ ,  $N=20$ ,  $\alpha_{AS}=100$  and  $\alpha_{BS}=95$ .

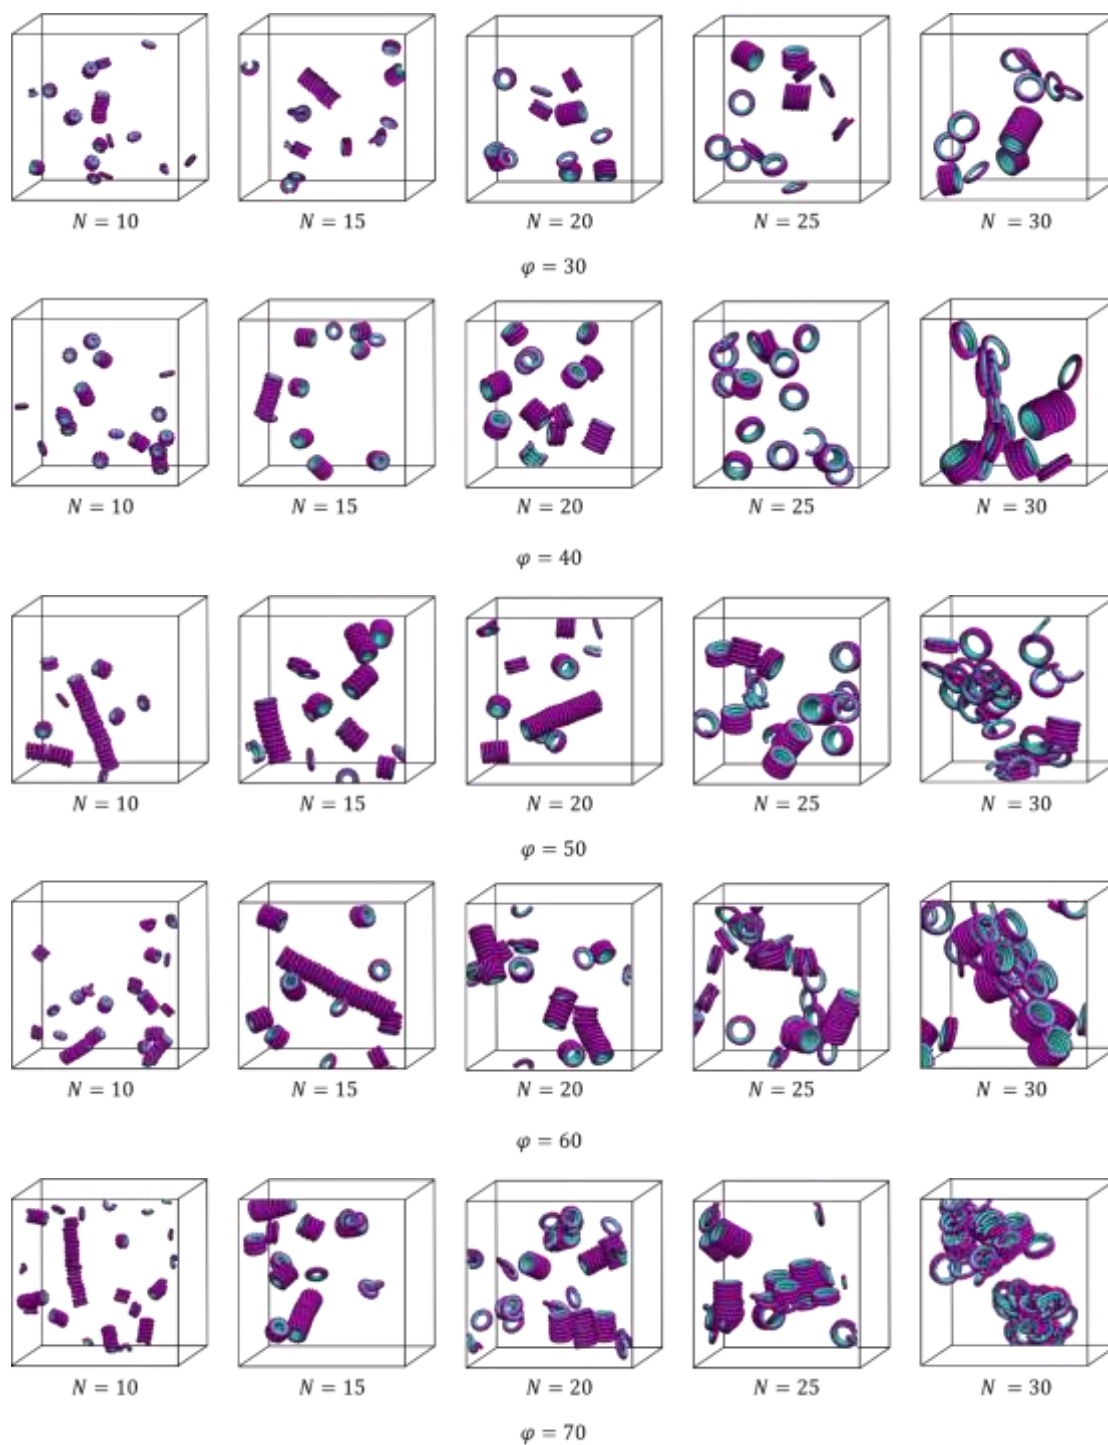

**Figure S33.** The snapshots of last frames extracted from MD trajectories in different values of  $N$  and  $\varphi$ , in which  $a_{AS}=55$ ,  $a_{BS}=100$  and  $a_{AB}=55$ .

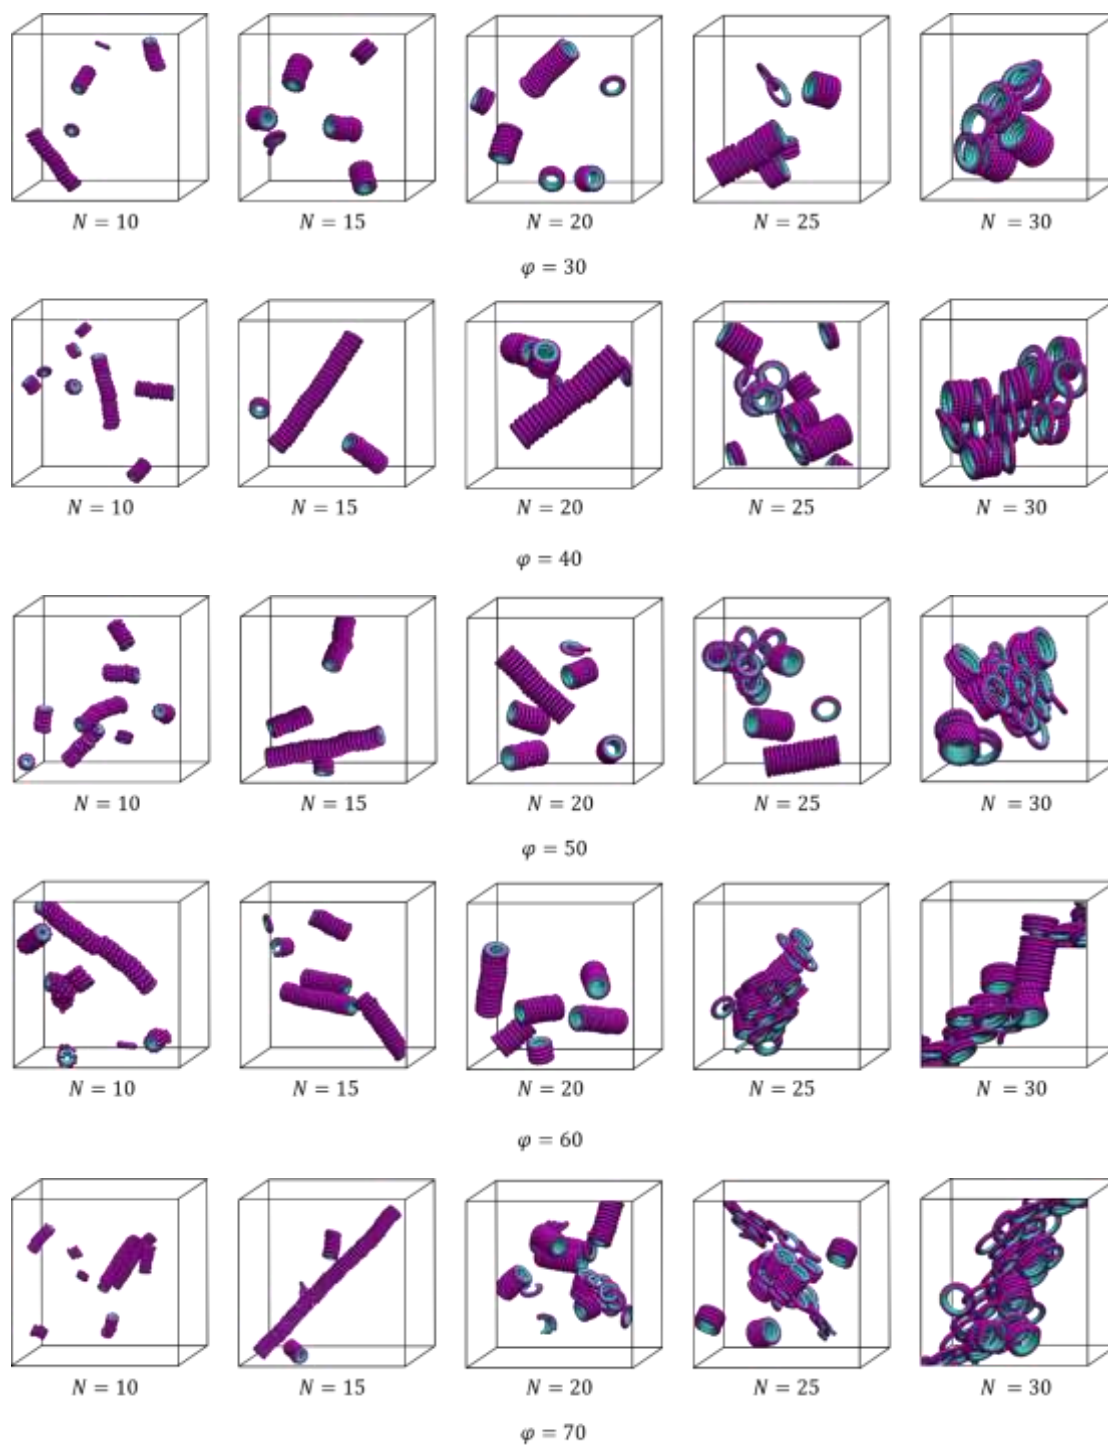

**Figure S34.** The snapshots of last frames extracted from MD trajectories in different values of  $N$  and  $\varphi$ , in which  $a_{AS}=60$ ,  $a_{BS}=100$  and  $a_{AB}=65$ .

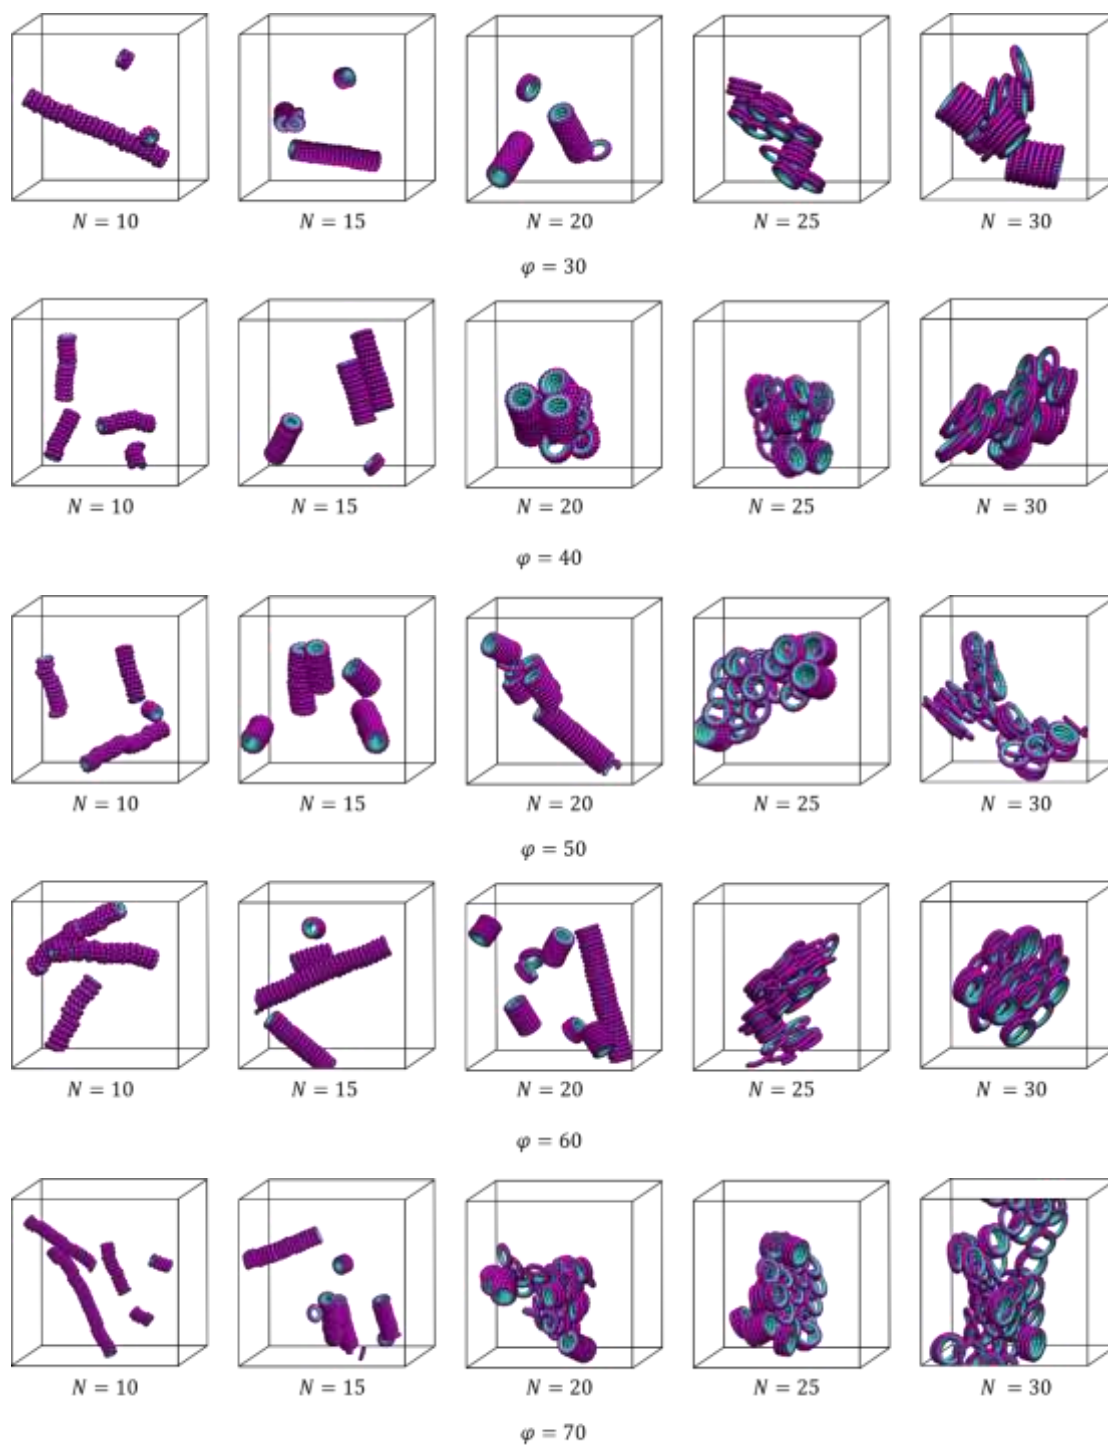

**Figure S35.** The snapshots of last frames extracted from MD trajectories in different values of  $N$  and  $\varphi$ , in which  $a_{AS}=85$ ,  $a_{BS}=100$  and  $a_{AB}=100$ .

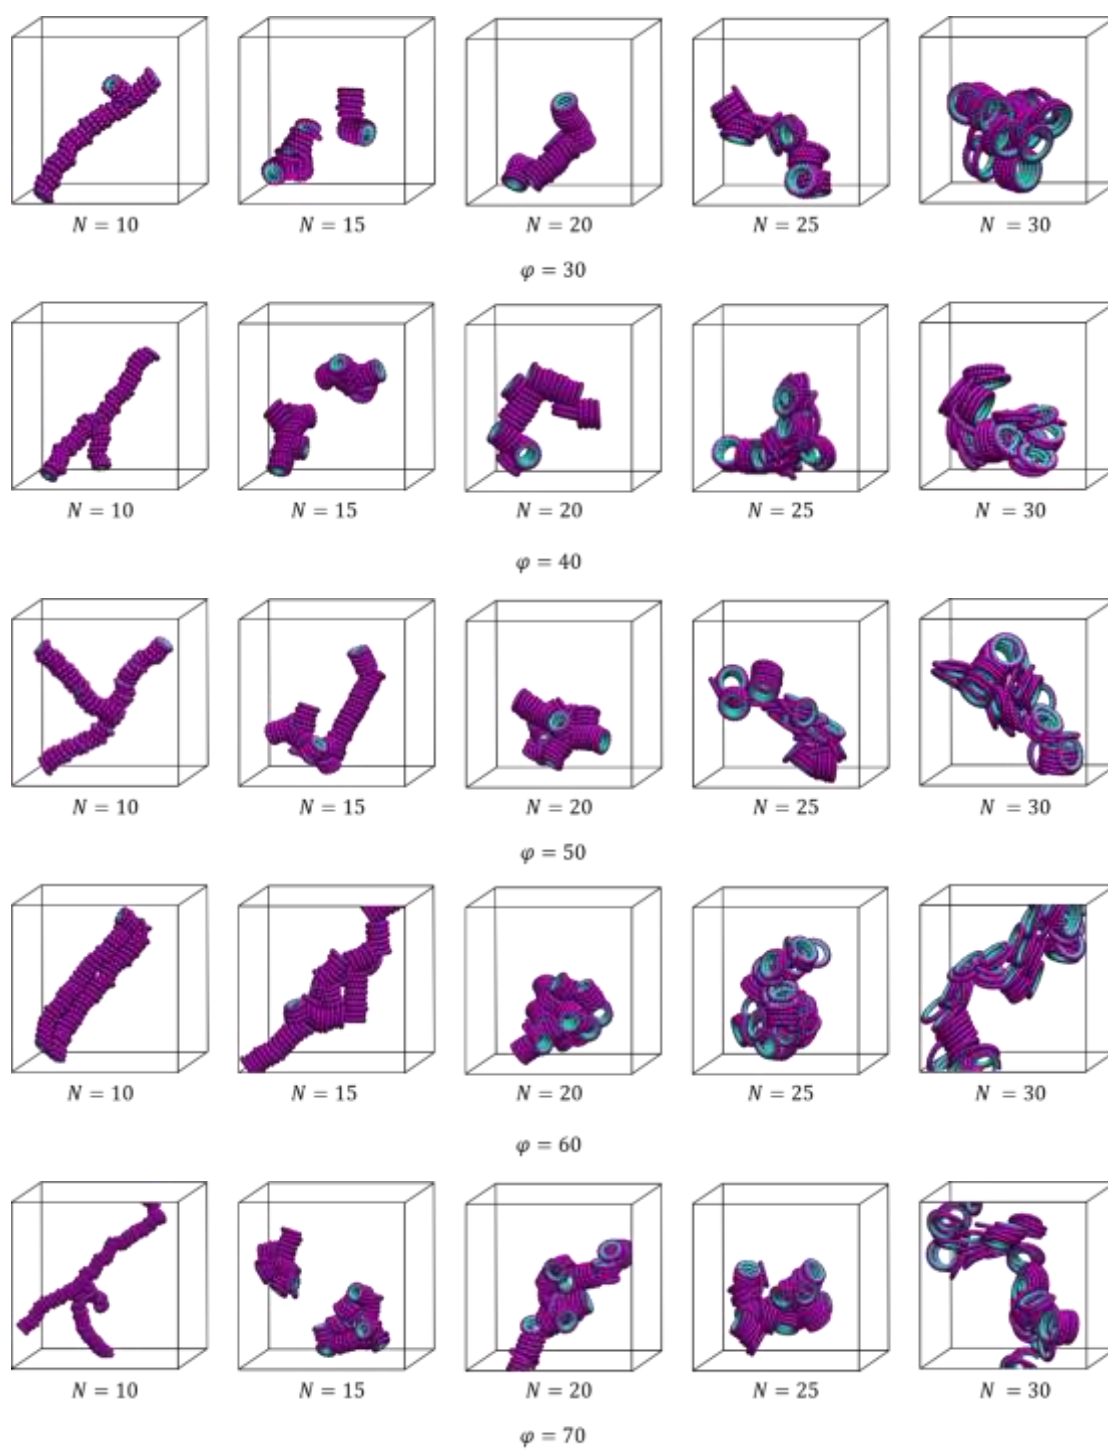

**Figure S36.** The snapshots of last frames extracted from MD trajectories in different values of  $N$  and  $\varphi$ , in which  $a_{AS}=100$ ,  $a_{BS}=100$  and  $a_{AB}=30$ .



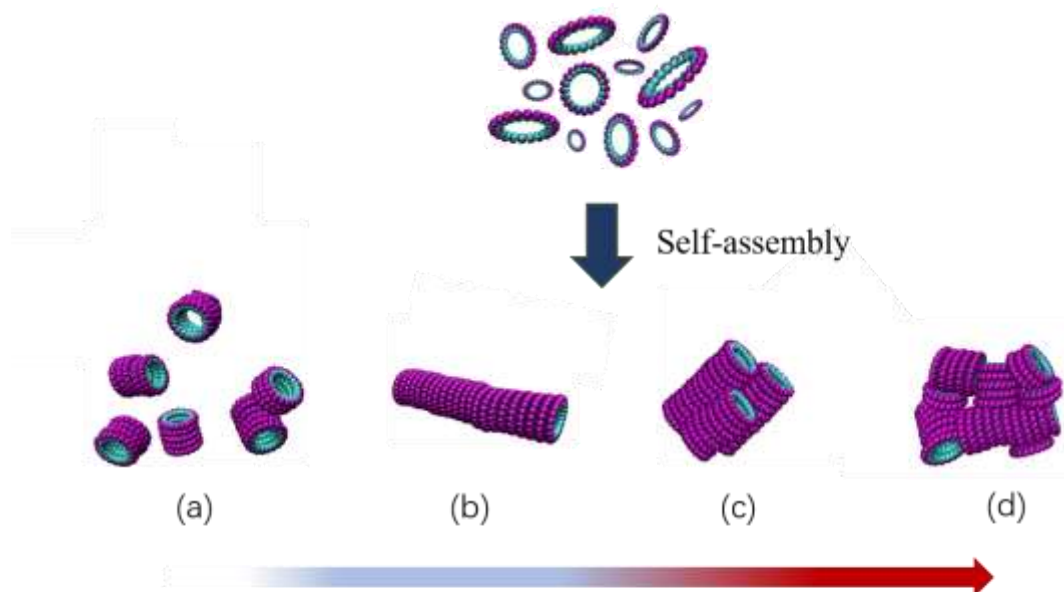

The affinity of A and S decreases, and the affinity of A and B increases.

(A: hydrophobic bead; B: hydrophilic bead; S: solvent bead)

**Figure S37.** Summary of the phase transformation along the changes of simulation parameters, in which the interaction affinity of A and S decreases and the interaction between A and B increases. Herein, the parameters of  $\varphi=40$  and  $N=20$ . In particular, (a) short independent channel; (b) long independent channel; (c) parallel channel; and (d) disordered channel.

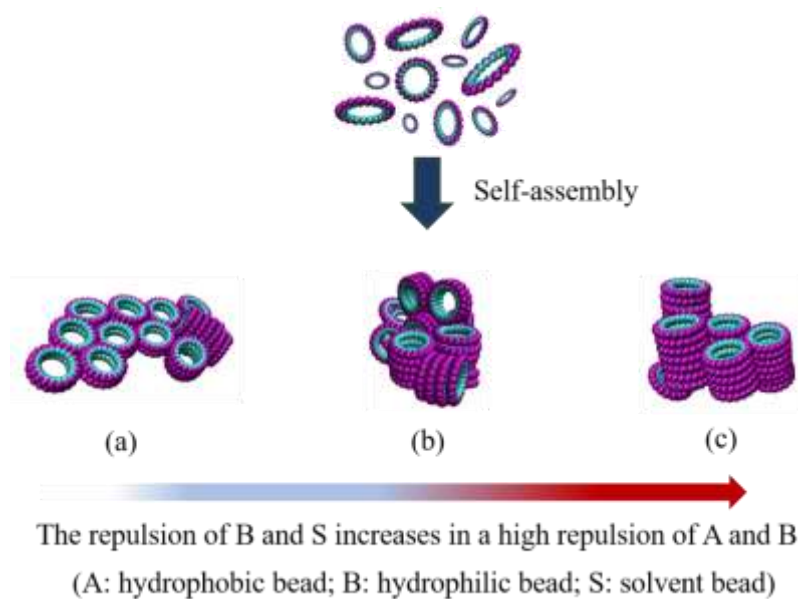

**Figure S38.** Summary of the phase transformation along the changes of simulation parameters, in which the repulsion of B and S beads increases. Herein, the parameters of  $\varphi=40$  and  $N=20$ . Meanwhile, there is a big interaction parameter for A and B beads. In particular, (a) Laterally parallel channel; (b) disordered channel; and (c) vertically parallel channel.
